# Supplementary material for: Development of green purification process for piperazine-type drugs: a case study of quetiapine process development
Source: Royal Society of Chemistry journal article supplement (doi:10.1039/d6ra00670a), 2026-05-20
Supplement: d6ra00670a1.pdf [file d6ra00670a1.pdf]

## *Supporting Information*

### Development of Green Purification Process for Piperazine-Type Drugs, Taking Quetiapine Process Development as an Example

Wenfeng Huang<sup>a, b</sup>, Youhu Wang<sup>b</sup>, Hanrong Liu<sup>b</sup>, Hui Li<sup>\*, b</sup>, Qiuxiang Yin<sup>\*, a</sup>

<sup>a</sup> School of Chemical Engineering and Technology, State Key Laboratory of Chemical Engineering, Tianjin University, Tianjin 300072, People's Republic of China;

<sup>b</sup> Zhejiang Huahai Pharmaceutical Co. Ltd., Xunqiao, Linhai, Zhejiang, 317204, PR China;

## Content

|                                                                                                           |    |
|-----------------------------------------------------------------------------------------------------------|----|
| 1. General information .....                                                                              | 3  |
| 2. List of impurities.....                                                                                | 3  |
| 3. The distribution experiment of <i>Int-2</i> and dimer in two phases under different pH conditions--    | 3  |
| 4. Dissolution experiment of quetiapine fumarate .....                                                    | 5  |
| 4.1 Dissolution experiment .....                                                                          | 5  |
| 4.2 Solubility curve.....                                                                                 | 6  |
| 5. confirmation experiments of improved process.....                                                      | 7  |
| 5.1 The synthesis of <i>Int-2</i> .....                                                                   | 7  |
| 5.2 The synthesis of quetiapine fumarate crude .....                                                      | 8  |
| 5.3 The synthesis of quetiapine fumarate API .....                                                        | 8  |
| 6. Hundred-kilogram scale experiments .....                                                               | 10 |
| 6.1 Preparation of <i>Int-2</i> .....                                                                     | 10 |
| 6.2 Preparation of quetiapine fumarate crude.....                                                         | 11 |
| 6.3 Preparation of quetiapine fumarate API .....                                                          | 12 |
| 6.4 Genotoxic structural alert impurities and <i>N</i> -nitrosamine impurities screening in the API ..... | 12 |
| 7. Comparison of the earlier process & new method .....                                                   | 14 |
| 7.1 Material balance .....                                                                                | 14 |
| 7.2 Solvent recovery information.....                                                                     | 15 |
| 7.3 Waste classification .....                                                                            | 15 |
| 7.4 Comparison of the earlier process & new method .....                                                  | 16 |
| 8. Spectra Data of the Compounds .....                                                                    | 17 |
| 9. Analysis methods for intermediates and finished products of quetiapine fumarate .....                  | 20 |
| 9.1 Analysis methods for <i>Int-2</i> .....                                                               | 20 |
| 9.2 Analysis methods for quetiapine fumarate crude.....                                                   | 21 |
| 9.3 Analysis methods for quetiapine fumarate.....                                                         | 21 |
| 10. NMR Spectra .....                                                                                     | 23 |
| 11. Representative HPLC chromatograms.....                                                                | 31 |
| 11.1 HPLC chromatograms of <i>Int-2</i> before and after pH optimization .....                            | 31 |
| 11.2 For Hundred-kilogram scale experiments .....                                                         | 33 |

## 1. General information

Unless otherwise noted, all reagents and solvents were purchased from commercial suppliers and used without further purification. All reactions were assembled on a Three-necked flask or reactor, were stirred with mixing propeller, and heated by water bath, unless otherwise specified. Hundred-kilogram scale experiments were carried out in the workshop of Zhejiang Huahai Pharmaceutical Co. Ltd. Reactions were monitored using thin-layer chromatography (TLC) and HPLC, and visualization of the developed plates was performed under UV light.

All pH values were measured at 20~30 °C, and all buffer systems were Na<sub>2</sub>HPO<sub>4</sub>/KH<sub>2</sub>PO<sub>4</sub> (3.533 g of Na<sub>2</sub>HPO<sub>4</sub> and 3.387 g of KH<sub>2</sub>PO<sub>4</sub> were dissolved in 1000 mL of water, pH=6.86).

## 2. List of impurities

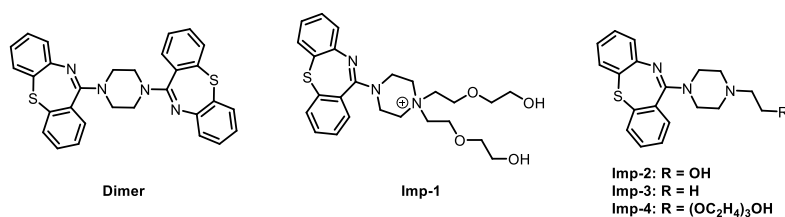

Figure 1 List of impurities

## 3. The distribution experiment of *Int-2* and dimer in two phases under different pH conditions

Slowly drip HCl (aq.) to the solution of *Int-2* that **SM2** has been removed to adjust to different pH values, test the content of *Int-2* and the dimer in organic phase and aqueous phase.

**Table 1** The distribution of *Int-2* and dimer in two phases under different pH conditions

| Entry | pH   | Phenomenon      | Organic phase  |         | Aqueous phase  |         |
|-------|------|-----------------|----------------|---------|----------------|---------|
|       |      |                 | <i>Int-2</i> % | Dimer % | <i>Int-2</i> % | Dimer % |
| 1     | 7.55 | turbid          | exist          | exist   | exist          | n.d     |
| 2     | 5.97 | turbid          | exist          | exist   | exist          | n.d     |
| 3     | 5.94 | turbid          | exist          | exist   | exist          | n.d     |
| 4     | 5.87 | turbid          | exist          | exist   | exist          | n.d     |
| 5     | 5.19 | turbid          | exist          | exist   | exist          | n.d     |
| 6     | 4.55 | turbid          | exist          | exist   | exist          | n.d     |
| 7     | 3.13 | turbid          | exist          | exist   | exist          | n.d     |
| 8     | 3.05 | turbid          | 3.98           | 51.69   | 99.87          | 0.03    |
| 9     | 2.45 | turbid          | 0.24           | 64.38   | 99.84          | 0.03    |
| 10    | 2.24 | dissolved clear | 0.15           | 68.51   | 99.86          | 0.02    |
| 11    | 1.47 | dissolved clear | 0.10           | 58.86   | 99.87          | 0.02    |
| 12    | 1.15 | dissolved clear | 0.03           | 67.73   | 99.63          | 0.24    |
| 13    | 0.97 | dissolved clear | 0.02           | 48.12   | 98.85          | 1.05    |
| 14    | 0.87 | dissolved clear | n.d            | 26.7    | 98.53          | 1.36    |

## 4. Dissolution experiment of quetiapine fumarate

### 4.1 Dissolution experiment

Add quetiapine fumarate to the ethanol solution at a certain temperature until saturation is reached. Record the weight of quetiapine fumarate at this point, which represents the solubility of quetiapine fumarate in this ethanol solution at this temperature.

**Table 2** Dissolution data in different ethanol solution

| Temp °C | 95%EtOH g/mL | 90% EtOH g/mL | 85% EtOH g/mL | 80% EtOH g/mL |
|---------|--------------|---------------|---------------|---------------|
| -5      | 0.008        | 0.01          | 0.04          | 0.06          |
| 0       | 0.03         | 0.04          | 0.06          | 0.08          |
| 5       | 0.03         | 0.05          | 0.08          | 0.13          |
| 10      | 0.04         | 0.11          | 0.14          | 0.21          |
| 15      | 0.06         | 0.14          | 0.17          | 0.28          |
| 20      | 0.07         | 0.16          | 0.2           | 0.31          |
| 25      | 0.08         | 0.21          | 0.25          | 0.46          |
| 30      | 0.11         | 0.23          | 0.28          | 0.53          |
| 35      | 0.19         | 0.3           | 0.34          | 0.66          |
| 40      | 0.26         | 0.36          | 0.49          | 0.79          |
| 45      | 0.34         | 0.41          | 0.61          | 0.95          |
| 50      | 0.4          | 0.5           | 0.72          | 1.17          |
| 55      | 0.47         | 0.68          | 0.95          | 1.46          |
| 60      | 0.64         | 0.76          | 1.08          | 1.51          |
| 65      | 0.78         | 1.02          | 1.35          | 1.89          |
| 70      | 0.98         | 1.11          | 1.4           | 2.07          |
| 75      | 1.15         | 1.26          | 2.08          | 3.27          |
| 80      | 1.26         | 2.16          | 3.33          | 4.34          |

## 4.2 Solubility curve

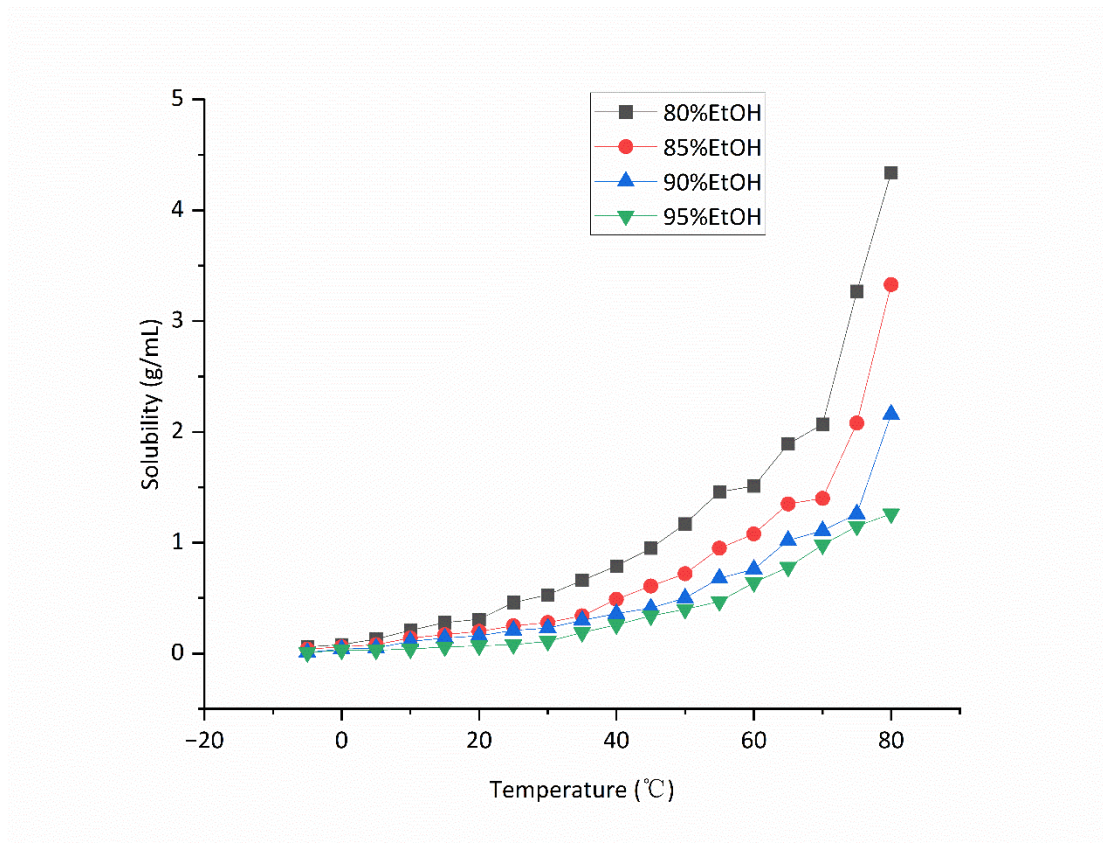

## 5. confirmation experiments of improved process

### 5.1 The synthesis of *Int-2*

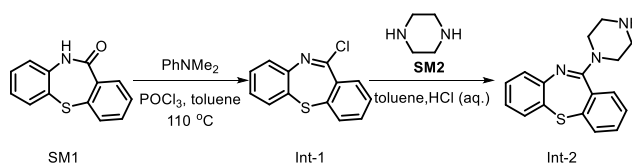

**SM1** (150 g), toluene (1500 mL), PhNMe<sub>2</sub> (60 g) and K<sub>2</sub>CO<sub>3</sub> (20 g) were added into a three-necked flask. Then, while stirring, POCl<sub>3</sub> (132 g) was added at 25-30 °C. Heat the mixture to 110 ± 5 °C for 8-10 h. After completion, the mixture cooled down to 0-10 °C. Saturated NaHCO<sub>3</sub> was added to wash and separate the layers, collect the organic phase for later use. To the solution of *Int-1*, toluene (500 mL) and **SM2** (225 g) were added, then heat the mixture to 110-115 °C and react for 4 h. Cool the mixture to 20-30 °C and filter to remove the excess **SM2**. Wash the filtrate twice with water. Then add water (1000 mL) and slowly drip in hydrochloric acid until the pH reaches 1.7-2.2. Separate the liquid and collect the aqueous phase to obtain the aqueous solution of *Int-2*.

**Table 3** The quality of the repeated batches of *Int-2*

| Batch | <i>Int-2</i> % | dimer % | <b>SM1</b> % | unknown impurity % | Total impurity % |
|-------|----------------|---------|--------------|--------------------|------------------|
| 1     | 99.6           | 0.03    | 0.02         | 0.15               | 0.4              |
| 2     | 99.7           | 0.04    | 0.05         | 0.09               | 0.3              |
| 3     | 99.6           | 0.06    | 0.08         | 0.07               | 0.4              |

**Table 4** Mass balance of *Int-2*

| Batch | pH  | <i>Int-2</i> in Reaction Mixture g | <i>Int-2</i> in Organic Phase g | <i>Int-2</i> in Aqueous Phase g | Product Loss % | Mass Balance % |
|-------|-----|------------------------------------|---------------------------------|---------------------------------|----------------|----------------|
| 1     | 1.9 | 190.0                              | 0.4                             | 183.1                           | 0.2            | 96.6           |
| 2     | 2.0 | 191.3                              | 0.6                             | 188.2                           | 0.3            | 98.7           |
| 3     | 1.9 | 190.2                              | 0.5                             | 184.3                           | 0.3            | 97.2           |

## 5.2 The synthesis of quetiapine fumarate crude

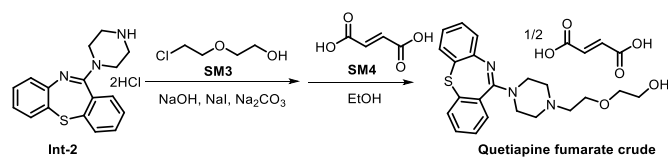

Toluene (800 mL) and NaOH aqueous solution (200 g) were added to the aqueous solution of *Int-2*, start the stirring, and allow separating into layers. Wash the toluene layer with water, and allow separating into layers. Then, **SM3** (85 g), Na<sub>2</sub>CO<sub>3</sub> (120 g), and NaI (11 g) were added to the flask while stirring, and heat the mixture to 110±5 °C for 24 hours. After the reaction was complete, cool the mixture to 50~60 °C, add water (800 mL) and stir, allow to separate into layers, then wash the toluene layer with water (500 mL\*3), and distill under reduced pressure to obtain an oily substance. Anhydrous ethanol (1350 L) and **SM4** (fumaric acid, 40 g) was added into the reactor, heat to 75~80 °C, reflux for 1 hour, then cool to 0±5 °C, and maintain temperature for 2~3 hours. Filter, the solid was the desired product.

**Table 5** The quality of the repeated batches of crude

| Batches | pH  | quetiapine % | Imp-2 % | Dimer |
|---------|-----|--------------|---------|-------|
| 1       | 1.9 | 99.76        | n.d     | n.d   |
| 2       | 2.0 | 99.69        | n.d     | n.d   |
| 3       | 2.1 | 99.85        | n.d     | n.d   |

## 5.3 The synthesis of quetiapine fumarate API

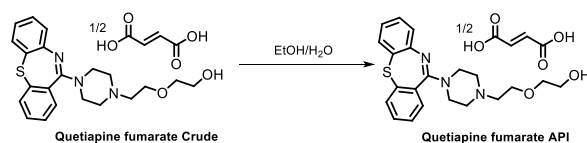

Crude product (50 g), anhydrous ethanol (180 mL) and water (20 mL) were added into the flask. Start stirring and heat to 75-80 °C until all the solids dissolve. Then, cooled down the solution to -5~0 °C, and stir for 2-3 h, Filter, collect solids and dry.

**Table 6** The quality of the repeated batches of API

| Batch | Quetiapine % | SM1 % | Dimer % | Imp-1 % | Imp-2 % | Imp-3 % | Imp-4 % | Total impurity % | Yield % |
|-------|--------------|-------|---------|---------|---------|---------|---------|------------------|---------|
|-------|--------------|-------|---------|---------|---------|---------|---------|------------------|---------|

|   |       |     |     |     |     |     |     |      |      |
|---|-------|-----|-----|-----|-----|-----|-----|------|------|
| 1 | 99.88 | n.d | n.d | n.d | n.d | n.d | n.d | 0.12 | 73.3 |
| 2 | 99.86 | n.d | n.d | n.d | n.d | n.d | n.d | 0.14 | 74.6 |
| 3 | 99.89 | n.d | n.d | n.d | n.d | n.d | n.d | 0.11 | 73.1 |

## 6. Hundred-kilogram scale experiments

Six batches of fumarate quetiapine were produced with total yields ranging from 70.1% to 74.4%, and an average yield of 73.1% (n = 6, SD=1.46, RSD = 2.00%).

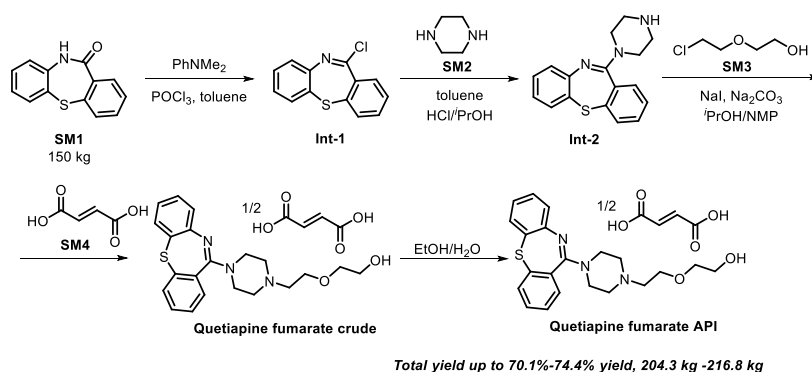

Scheme 1 Hundred-kilogram scale experiments

### 6.1 Preparation of *Int-2*

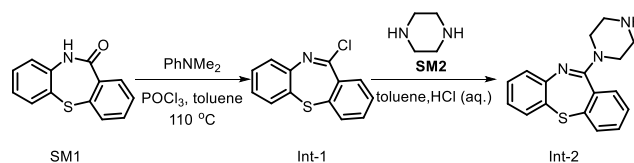

To a stirred solution of **SM1** (150 kg) in toluene (1500 L) and *N, N*-dimethylaniline (60 kg) and potassium carbonate (20 kg) were added phosphorus oxychloride (132 kg) at 25-30 °C. The temperature of the reaction mass was raised to 105-115 °C and maintained for 8-10 h. After completion of the reaction by TLC, cool down to 0-10 °C. Sodium bicarbonate solution (500 L) was added to wash and separate the layers. To the organic layer, supplement with toluene (500 L) and add 225 kg of **SM2** (225 kg), then heat to 110-115 °C and react for 4 hours. Cool the mixture to 20-30 °C and filter to remove the excess **SM2**. Wash the filtrate twice with water. Then add 1000 liters of potable water and slowly drip in hydrochloric acid until the pH reaches 1.7-2.2. Perform a phase separation to obtain the aqueous solution of *Int-2*.

Table 7 Quality statistics for the scaled-up batch of *Int-2*

| Batch | <i>Int-2</i> % | Dimer % | SM1 % | Unknown Impurity % | Total Impurities % |
|-------|----------------|---------|-------|--------------------|--------------------|
| 001   | 99.70          | N.D     | 0.01  | 0.20               | 0.30               |

|     |       |      |      |      |      |
|-----|-------|------|------|------|------|
| 002 | 99.59 | N.D  | 0.01 | 0.22 | 0.41 |
| 003 | 99.56 | N.D  | 0.02 | 0.23 | 0.44 |
| 004 | 99.73 | 0.02 | 0.02 | 0.14 | 0.27 |
| 005 | 99.72 | 0.03 | 0.01 | 0.12 | 0.28 |
| 006 | 99.60 | 0.03 | 0.04 | 0.16 | 0.40 |
| SD  | 0.07  | --   | --   | --   | --   |
| RSD | 0.07% | --   | --   | --   | --   |

## 6.2 Preparation of quetiapine fumarate crude

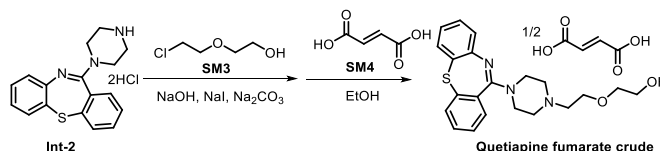

Toluene (800 L) and 200kg of sodium hydroxide aqueous solution were added to the aqueous solution of *Int-2*, start the stirring, and allow separating into layers. Wash the toluene layer with 300L of water, and allow separating into layers. Then, **SM3** (85 kg), Na<sub>2</sub>CO<sub>3</sub> (120 kg), and NaI (11 kg) were added to the reactor while stirring, and heat to 110±5 °C, then react for 24 hours. After the reaction was complete, cool the material to 50~60 °C, add water (800 L) and stir, allow to separate into layers, then wash the toluene layer with 500L×3 of water, and distill under reduced pressure to obtain an oily substance. Anhydrous ethanol (1350 L) and **SM4** (fumaric acid, 40 kg) was added into the reactor, heat to 75~80 °C, reflux react for 1 hour, then cool to 0±5 °C, and maintain temperature for 2~3 hours. Centrifuge and filter to obtain the wet product, with the weight recorded as M<sub>1</sub>.

**Table 8** Quality statistics for the scaled-up batch of quetiapine fumarate crude

| Batch | Quetiapine % | Int-2 % | Dimer % | Unknown Impurity % | Total Impurities % |
|-------|--------------|---------|---------|--------------------|--------------------|
| 001   | 99.75        | 0.03    | 0.03    | 0.08               | 0.25               |
| 002   | 99.68        | 0.03    | 0.03    | 0.07               | 0.32               |
| 003   | 99.70        | 0.05    | 0.03    | 0.08               | 0.30               |
| 004   | 99.82        | 0.05    | 0.04    | 0.07               | 0.18               |
| 005   | 99.84        | 0.06    | 0.01    | 0.05               | 0.16               |
| 006   | 99.85        | 0.03    | 0.02    | 0.05               | 0.15               |
| SD    | 0.09         | --      | --      | --                 | --                 |
| RSD   | 0.09%        | --      | --      | --                 | --                 |

### 6.3 Preparation of quetiapine fumarate API

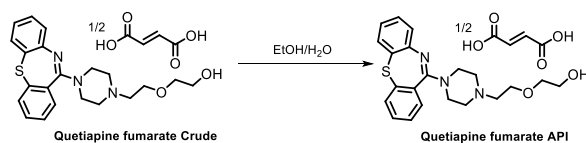

Crude product (M<sub>1</sub> kg), anhydrous ethanol (2.84M<sub>1</sub> kg) and purified water (0.4M<sub>1</sub> kg) were added into the reactor. Stir and heat to 75-80 °C for 2 h until the solid material was completely dissolved, then cool down to -5~0 °C for crystallization for 2-3 hours, centrifuge and filter, dry to obtain the final finished product.

**Table 9** Quality statistics for the scaled-up batch of API

| Batch | Yield % | Quetiapine % | SM1 % | Int-2 % | Dimer % | Imp-1 % | Imp-2 % | Imp-3 % | Imp-4 % | Unknown Impurity % | Total Impurities % |
|-------|---------|--------------|-------|---------|---------|---------|---------|---------|---------|--------------------|--------------------|
| 001   | 70.1    | 99.67        | N.D   | 0.01    | 0.01    | 0.01    | 0.05    | 0.01    | 0.06    | 0.03               | 0.33               |
| 002   | 73.3    | 99.71        | N.D   | 0.01    | 0.01    | 0.01    | 0.05    | 0.01    | 0.05    | 0.02               | 0.29               |
| 003   | 73.2    | 99.68        | N.D   | 0.02    | 0.01    | 0.01    | 0.05    | 0.01    | 0.05    | 0.04               | 0.32               |
| 004   | 73.0    | 99.70        | N.D   | 0.02    | 0.01    | 0.01    | 0.05    | 0.01    | 0.05    | 0.02               | 0.30               |
| 005   | 74.4    | 99.69        | N.D   | 0.03    | 0.00    | 0.01    | 0.04    | 0.01    | 0.04    | 0.03               | 0.31               |
| 006   | 74.4    | 99.80        | N.D   | 0.01    | n.d     | 0.01    | 0.01    | 0.01    | 0.01    | 0.03               | 0.20               |
| SD    | 1.46    | 0.05         | --    | --      | --      | --      | --      | --      | --      | --                 | --                 |
| RSD   | 2.00%   | 0.05%        | --    | --      | --      | --      | --      | --      | --      | --                 | --                 |

### 6.4 Genotoxic structural alert impurities and N-nitrosamine impurities screening in the API

In order to confirm whether the optimized process meets the control requirements for impurities as stipulated by ICH M7, a total of 12 potential impurities were assessed, including genotoxic structural alert impurities (**Table 9**, entries 1–6) and N-nitrosamine impurities (**Table 9**, entries 7–12). The detailed impurity list, structures, control limits, and investigation results are summarized in the table below.

**Table 10** Screening of genotoxic structural alert impurities and N-nitrosamine impurities

| Entry | Name                                                    | Structure                                                                           | Limit ppm | Results |
|-------|---------------------------------------------------------|-------------------------------------------------------------------------------------|-----------|---------|
| 1     | 2-(phenylthio)aniline                                   | 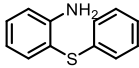   | 1.88      | N.D     |
| 2     | 1-chloro-2-nitrobenzene                                 |    | 1.88      | N.D     |
| 3     | (2-nitrophenyl)(phenyl)sulfane                          |    | 1.88      | N.D     |
| 4     | benzene                                                 |    | 1.88      | N.D     |
| 5     | acetaldehyde                                            |    | 10.00     | N.D     |
| 6     | 1,1-diethoxyethane                                      |    | 10.00     | N.D     |
| 7     | <i>N,N</i> -diethylnitrous amide<br>(NDEA)              |   | 0.03      | N.D     |
| 8     | <i>N,N</i> -dimethylnitrous amide<br>(NDMA)             |  | 0.12      | N.D     |
| 9     | 11-(4-nitrosopiperazin-1-yl)dibenzo[b,f][1,4]thiazepine |  | 0.43      | N.D     |
| 10    | 2-(2-(4-nitrosopiperazin-1-yl)ethoxy)ethan-1-ol         |  | 0.43      | N.D     |
| 11    | 1-nitrosopiperazine                                     |  | 0.43      | N.D     |
| 12    | 1,4-dinitrosopiperazine                                 |  | 0.43      | N.D     |

## 7. Comparison of the earlier process & new method

### 7.1 Material balance

Detailed material balance information is shown in the **Table 10**.

**Table 11** Material balance

| Process              | Input |                                  |          | Output |                                  |                          |        |
|----------------------|-------|----------------------------------|----------|--------|----------------------------------|--------------------------|--------|
|                      | No.   | Name                             | kg/batch | No.    | Name                             | kg/batch                 |        |
| Preparation of Int-2 | 1     | SM1                              | 150      | 1      | Aqueous solution of <i>Int-2</i> | 1250                     |        |
|                      | 2     | Toluene                          | 2180     | 2      | Exhaust gas                      | Toluene                  | 35     |
|                      | 3     | K <sub>2</sub> CO <sub>3</sub>   | 20       | 3      |                                  | Phosphorus oxychloride   | 3      |
|                      | 4     | <i>N, N</i> -dimethylaniline     | 60       | 4      |                                  | hydrogen chloride        | 5      |
|                      | 5     | Phosphorus oxychloride           | 132      | 5      | Effluent                         | Brine waste              | 2250   |
|                      | 6     | Water                            | 3000     | 6      | Waste solvent                    | Toluene (To be recycled) | 2243   |
|                      | 7     | NaHCO <sub>3</sub>               | 30       |        |                                  |                          |        |
|                      | 8     | SM2                              | 225      | 7      | Solid waste                      | SM2                      | 155    |
|                      | 9     | Hydrochloric acid                | 144      |        |                                  |                          |        |
| Preparation of crude | 10    | Aqueous solution of <i>Int-2</i> | 1250     | 8      | Quetiapine fumarate crude        |                          | 270    |
|                      | 11    | Toluene                          | 523.2    | 9      | Exhaust gas                      | Toluene                  | 8.2    |
|                      | 12    | NaOH (aq.)                       | 199.5    | 10     |                                  | EtOH                     | 6      |
|                      | 13    | SM3                              | 85       | 11     | Effluent                         | Brine waste              | 3871.5 |
|                      | 14    | Na <sub>2</sub> CO <sub>3</sub>  | 120      | 12     | Waste solvent                    | Toluene (To be recycled) | 510    |
|                      | 15    | NaI                              | 4        |        |                                  |                          |        |
|                      | 16    | Water                            | 2600     | 13     |                                  |                          |        |
|                      | 17    | EtOH                             | 1066     |        |                                  |                          |        |
| 18                   | SM4   | 40                               |          |        |                                  |                          |        |
| Preparation of API   | 19    | Quetiapine fumarate crude        | 270      | 14     | API                              |                          | 213    |
|                      | 20    | EtOH                             | 813.3    | 15     | Exhaust gas                      | EtOH                     | 13.3   |
|                      | 21    | Water                            | 110      | 16     | Waste solvent                    | Mother liquor            | 967    |

So, the average output of each batch of API:  $M_{API}=213$  kg, total material input:  $M_{in}=11502$  kg, and total amount of three wastes:  $M_{Wastes}=11289$  kg.

$$PMI' = M_{in} / M_{API} = 11502 \text{ kg} / 213 \text{ kg} = 54.0$$

$$E\text{-factor}' = M_{Wastes} / M_{API} = 11289 \text{ kg} / 213 \text{ kg} = 53.0$$

## 7.2 Solvent recovery information

Detailed solvent recovery information is shown in the **Table 11**.

**Table 12** Solvent recovery information

| Entry | Solution | Input kg | Recovery kg | Recovery ratio % | Content in waste kg | Wastage kg |
|-------|----------|----------|-------------|------------------|---------------------|------------|
| 1     | toluene  | 2703     | 2471        | 91.42%           | 189                 | 43         |
| 2     | EtOH     | 1879     | 1314        | 69.93%           | 546                 | 19         |

So, the total amount of solvent recovered from each batch of API:  $M_r = 189 \text{ kg} + 546 \text{ kg} = 734 \text{ kg}$ ; After solvent recovery, total material loss:  $M_{in}' = M_{in} - M_r = 11502 \text{ kg} - 734 \text{ kg} = 10768 \text{ kg}$ ; total amount of the three wastes:  $M_{Wastes}' = M_{Wastes} - M_r = 11289 \text{ kg} - 734 \text{ kg} = 10555 \text{ kg}$ . Therefore, After solvent recovery:

$$PMI = M_{in}' / M_{API} = 10768 \text{ kg} / 213 \text{ kg} = 50.6$$

$$E\text{-factor} = M_{Wastes}' / M_{API} = 10555 \text{ kg} / 213 \text{ kg} = 49.6$$

## 7.3 Waste classification

Detailed waste classification is shown in the **Table 12**.

**Table 13** Waste classification

| Entry | Category of Waste | Weight kg | Proportion % | Main components                                          |
|-------|-------------------|-----------|--------------|----------------------------------------------------------|
| 1     | Exhaust gas       | 71        | 0.7          | Toluene, phosphorus oxychloride, hydrogen chloride, EtOH |
| 2     | Effluent          | 6122      | 58.0         | Water, inorganic salt                                    |
| 3     | Organic waste     | 4207      | 39.9         | EtOH, Toluene, a small quantity of API                   |
| 4     | Solid residue     | 155       | 1.5          | Piperazine hydrochloride                                 |
| 5     | Total             | 10555     | 100.0        | -                                                        |

## 7.4 Comparison of the earlier process & new method

Based on the above data, a comparison was made between the new method and the earlier process in terms of green chemical indicators. For detailed data, please refer to **Table 13**.

**Table 14** Comparison of the earlier process & new method in green chemical indicators

| Entry | Green indicator | Earlier process | New method | Improvement |
|-------|-----------------|-----------------|------------|-------------|
| 1     | Average yield % | 60.5            | 73.1       | ↑ 20.8%     |
| 2     | Time/batch h    | 170             | 108        | ↓36.5%      |
| 3     | E-factor        | 125.6           | 49.6       | ↓60.5%      |
| 4     | PMI             | 126.6           | 50.6       | ↓60.0%      |

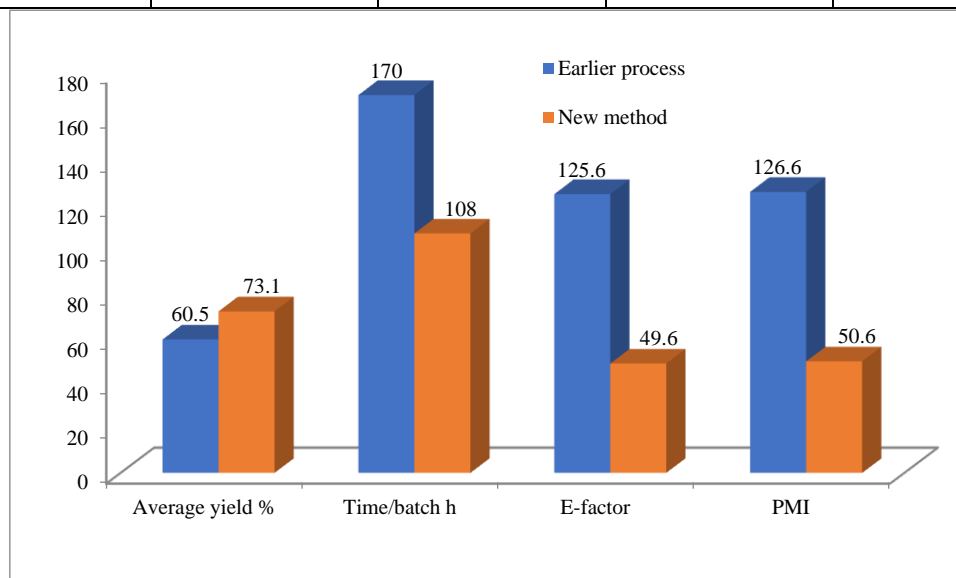

**Figure 2** Comparison of the earlier process & new method

## 8. Spectra Data of the Compounds

### 11-(piperazin-1-yl)dibenzo[b,f][1,4]thiazepine (*Int-2*)

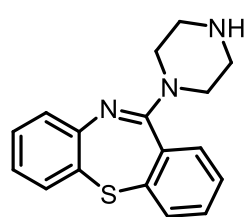

$^1\text{H NMR}$  (400 MHz,  $\text{CDCl}_3$ )  $\delta$  7.51 (t,  $J = 7.5$  Hz, 1H), 7.44 – 7.24 (m, 4H), 7.18 (q,  $J = 9.3$  Hz, 1H), 7.07 (d,  $J = 8.4$  Hz, 1H), 6.91 (dt,  $J = 25.6, 7.9$  Hz, 1H), 4.22 – 3.14 (m, 6H), 2.89 – 2.43 (m, 2H).  $^{13}\text{C NMR}$  (100 MHz,  $\text{CDCl}_3$ )  $\delta$  160.9, 160.0, 148.9, 148.1, 140.1, 139.9, 134.2, 133.3, 132.4, 132.3, 132.2, 132.2, 131.5, 130.8, 129.3, 129.1, 129.0, 128.7, 128.7, 128.3, 128.0, 127.9, 125.3, 125.2, 123.8, 122.8, 80.7, 53.5, 51.3, 42.9. **HRMS (ESI):** calcd for  $\text{C}_{17}\text{H}_{18}\text{N}_3\text{S}^+$  [ $\text{M} + \text{H}$ ] $^+$ : 296.1216, found: 296.1220

### 2-(2-(4-(dibenzo[b,f][1,4]thiazepin-11-yl)piperazin-1-yl)ethoxy)ethan-1-ol (*quetiapine*)

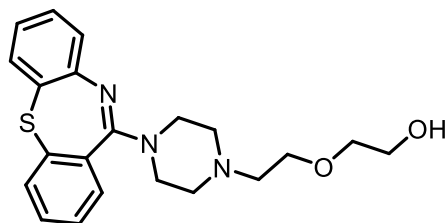

$^1\text{H NMR}$  (400 MHz,  $\text{CDCl}_3$ )  $\delta$  7.50 (d,  $J = 7.4$  Hz, 1H), 7.38 (d,  $J = 8.0$  Hz, 1H), 7.31 (d,  $J = 11.6$  Hz, 3H), 7.15 (d,  $J = 8.0$  Hz, 1H), 7.07 (d,  $J = 8.1$  Hz, 1H), 6.87 (t,  $J = 7.8$  Hz, 1H), 4.18 (s, 1H), 3.93 – 3.18 (m, 10H), 2.77 – 2.47 (m, 6H).  $^{13}\text{C NMR}$  (100 MHz,  $\text{CDCl}_3$ )  $\delta$  160.6, 148.9, 139.9, 134.1, 132.2, 132.2, 130.8, 129.1, 129.0, 128.3, 128.0, 125.3, 122.8, 72.4, 67.7, 62.0, 58.0, 53.5, 53.1. **HRMS (ESI):** calcd for  $\text{C}_{21}\text{H}_{26}\text{N}_3\text{O}_2\text{S}^+$  [ $\text{M} + \text{H}$ ] $^+$ : 384.1740, found: 384.1745.

### quetiapine fumarate API

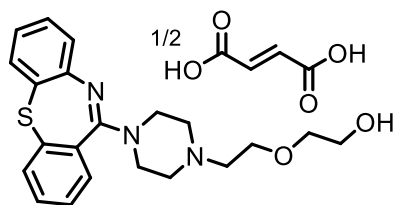

$^1\text{H NMR}$  (400 MHz, DMSO)  $\delta$  7.57 – 7.51 (m, 1H), 7.47 – 7.35 (m, 4H), 7.18 (td,  $J = 8.0, 1.5$  Hz, 1H), 6.99 (dd,  $J = 8.0, 1.3$  Hz, 1H), 6.89 (td,  $J = 7.5, 1.4$  Hz, 1H), 6.61 (s, 1H), 5.64 (s, 2H), 3.75 – 3.15 (m, 10H), 2.59 (t,  $J = 5.8$  Hz, 3H), 2.57 – 2.50 (m, 3H).  $^{13}\text{C NMR}$  (100 MHz, DMSO)  $\delta$  166.5, 160.1, 148.6, 138.71 (s), 134.3, 133.5, 132.1, 132.0, 131.3, 129.3, 129.1, 129.0, 127.2, 125.1, 122.6, 72.3, 67.9, 60.3, 57.1, 52.6, 46.0.

1,4-bis(dibenzo[b,f][1,4]thiazepin-11-yl)piperazine (*Dimer*)

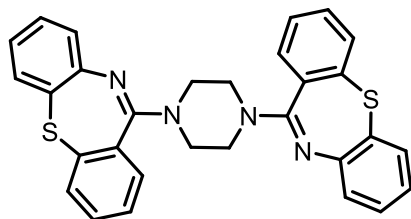

$^1\text{H NMR}$  (400 MHz,  $\text{CDCl}_3$ )  $\delta$  7.82 – 7.74 (m, 2H), 7.65 (m, 4H), 7.60 – 7.49 (m, 4H), 7.47 – 7.31 (m, 6H), 4.73 – 4.53 (m, 2H), 4.49 (m, 1H), 4.40 – 4.26 (m, 2H), 4.24 – 3.98 (m, 2H), 3.78 – 3.52 (m, 1H). **HRMS (ESI):**

calcd for  $\text{C}_{30}\text{H}_{25}\text{N}_4\text{S}_2^+$   $[\text{M} + \text{H}]^+$ : 505.1515, found: 505.1511.

4-(dibenzo[b,f][1,4]thiazepin-11-yl)-1,1-bis(2-(2-hydroxyethoxy)ethyl)piperazin-1-ium chloride (*Imp-1*)

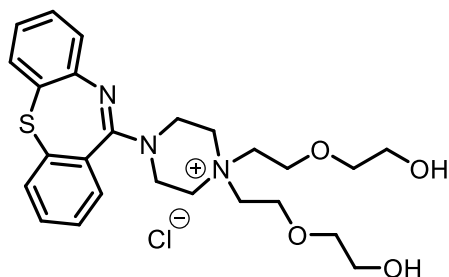

$^1\text{H NMR}$  (400 MHz, EtOD)  $\delta$  7.64 (m, 1H), 7.55 (m, 1H), 7.50 – 7.37 (m, 3H), 7.22 (m, 1H), 7.09 (m, 1H), 6.97 (m, 1H), 4.53 (s, 2H), 4.04 – 3.79 (m, 11H), 3.72 – 3.57 (m, 10H), 3.35 (s, 3H).  $^{13}\text{C NMR}$  (100 MHz, EtOD)  $\delta$  160.4, 148.0, 139.8, 132.9, 132.0, 131.9, 131.6, 129.4, 129.0,

128.1, 125.2, 123.7, 72.5, 64.3, 60.4, 59.6, 48.4, 40.7.

2-(4-(dibenzo[b,f][1,4]thiazepin-11-yl)piperazin-1-yl)ethan-1-ol (*Imp-2*)

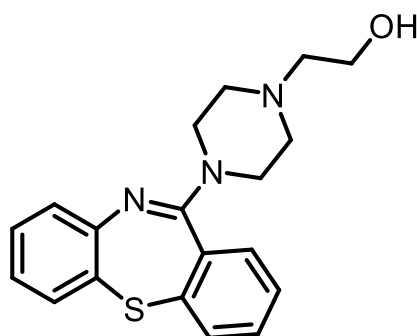

$^1\text{H NMR}$  (400 MHz,  $\text{CDCl}_3$ )  $\delta$  7.51 (d,  $J = 7.2$  Hz, 1H), 7.39 (d,  $J = 7.6$  Hz, 1H), 7.35 – 7.26 (m, 3H), 7.17 (t,  $J = 7.1$  Hz, 1H), 7.08 (d,  $J = 7.8$  Hz, 1H), 6.88 (t,  $J = 7.3$  Hz, 1H), 3.75 – 3.33 (m, 6H), 2.75 (s, 1H), 2.58 (m, 6H).  $^{13}\text{C NMR}$  (100 MHz,  $\text{CDCl}_3$ )  $\delta$  160.9, 148.9, 140.0, 134.2, 132.3, 130.9, 129.2, 129.1, 129.1, 128.4,

128.1, 125.4, 123.0, 59.6, 57.9, 52.8, 46.9. **HRMS (ESI):** calcd for  $\text{C}_{19}\text{H}_{22}\text{N}_3\text{OS}^+$   $[\text{M} + \text{H}]^+$ : 340.1478, found: 340.1472.

11-(4-ethylpiperazin-1-yl)dibenzo[b,f][1,4]thiazepine (**Imp-3**)

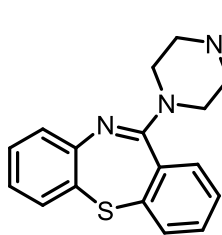

$^1\text{H NMR}$  (400 MHz,  $\text{CDCl}_3$ )  $\delta$  7.50 (d,  $J = 6.0$  Hz, 1H), 7.38 (d,  $J = 7.5$  Hz, 1H), 7.29 (m, 3H), 7.16 (t,  $J = 7.3$  Hz, 1H), 7.07 (d,  $J = 7.7$  Hz, 1H), 6.87 (t,  $J = 7.2$  Hz, 1H), 3.56 (s, 4H), 2.50 (m, 6H), 1.11 (t,  $J = 6.5$  Hz, 3H).  $^{13}\text{C NMR}$  (100 MHz,  $\text{CDCl}_3$ )  $\delta$  160.9, 149.1, 140.1,

134.3, 132.3, 132.3, 130.8, 129.2, 129.1, 128.3, 128.1, 125.5, 122.9, 52.8, 52.5, 46.7, 12.1.

**HRMS (ESI):** calcd for  $\text{C}_{19}\text{H}_{22}\text{N}_3\text{S}^+$  [ $\text{M} + \text{H}$ ] $^+$ : 324.1529, found: 324.1533.

2-(2-(2-(2-(4-(dibenzo[b,f][1,4]thiazepin-11-yl)piperazin-1-yl)ethoxy)ethoxy)ethoxy)ethan-1-ol (**Imp-4**)

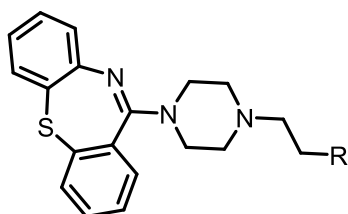

$^1\text{H NMR}$  (400 MHz,  $\text{CDCl}_3$ )  $\delta$  7.46 (d,  $J = 5.9$  Hz, 1H), 7.35 (d,  $J = 7.5$  Hz, 1H), 7.26 (m, 3H), 7.12 (t,  $J = 7.2$  Hz, 1H), 7.03 (d,  $J = 7.7$  Hz, 1H), 6.83 (t,  $J = 7.1$  Hz, 1H), 3.66 (m, 6H), 3.60 (m, 10H), 3.54 (m, 3H), 2.57 (m, 6H).  $^{13}\text{C NMR}$

**Imp-4: R =  $(\text{OC}_2\text{H}_4)_3\text{OH}$**

(100 MHz,  $\text{CDCl}_3$ )  $\delta$  160.7, 148.7, 139.7, 133.8, 132.0, 132.0,

130.7, 129.0, 128.9, 128.2, 128.0, 125.1, 122.7, 72.6, 70.4, 70.3, 70.0, 70.0, 68.4, 61.3, 57.6,

53.1, 50.0, 46.3. **HRMS (ESI):** calcd for  $\text{C}_{25}\text{H}_{34}\text{N}_3\text{O}_4\text{S}^+$  [ $\text{M} + \text{H}$ ] $^+$ : 472.2265, found:

472.2266.

## 9. Analysis methods for intermediates and finished products of quetiapine fumarate

### 9.1 Analysis methods for *Int-2*

#### Chromatographic condition:

Instrument: HPLC with a UV detector

Liquid chromatography column: Waters Symmetry C18, 4.6\*75 mm, 3.5 µm

Buffer solution preparation: Dissolve  $\text{KH}_2\text{PO}_4$  (0.68 g) in water (1000 mL), add  $\text{Et}_3\text{N}$  (2.5 mL), and adjust the pH to 3.0 with  $\text{H}_3\text{PO}_4$

Mobile phase A: The buffer solution

Mobile phase B: Acetonitrile

Flow rate: 1.0 mL/min

Column temperature: 30 °C

Wavelength: 240 nm

Sample load: 40 µL

Gradient table:

| Time (min) | Mobile phase A (% V/V) | Mobile phase B (% V/V) |
|------------|------------------------|------------------------|
| 0          | 90                     | 10                     |
| 15         | 73                     | 27                     |
| 19         | 15                     | 85                     |
| 24         | 15                     | 85                     |
| 26         | 90                     | 10                     |
| 28         | 90                     | 10                     |

## 9.2 Analysis methods for quetiapine fumarate crude

### Chromatographic condition:

Instrument: HPLC with a UV detector

Liquid chromatography column: Waters XBridge C8, 150\*4.6 mm, 3.5  $\mu$ m

Buffer solution preparation: Adjust the pH of the 3.1g/L ammonium acetate aqueous solution to 9.5 with ammonia water

Mobile phase A: Buffer solution: acetonitrile = 75: 25 (V/V)

Mobile phase B: Acetonitrile

Flow rate: 1.5 mL/min

Column temperature: 45 °C

Wavelength: 250 nm

Sample load: 20  $\mu$ L

Gradient table:

| Time (min) | Mobile phase A (% V/V) | Mobile phase B (% V/V) |
|------------|------------------------|------------------------|
| 0          | 100                    | 0                      |
| 25         | 100                    | 0                      |
| 60         | 29.3                   | 70.7                   |
| 60.1       | 100                    | 0                      |
| 68         | 100                    | 0                      |

## 9.3 Analysis methods for quetiapine fumarate

### Chromatographic condition:

Instrument: HPLC with a UV detector

Liquid chromatography column: Waters XTerra RP8, 150\*4.6 mm, 3.5  $\mu$ m

Buffer solution preparation: Adjust the pH of the 3.1g/L ammonium acetate aqueous solution to 9.5 with ammonia water

Mobile phase A: Buffer solution: acetonitrile = 75: 25 (V/V)

Mobile phase B: Acetonitrile

Flow rate: 1.5 mL/min

Column temperature: 45 °C

Wavelength: 250 nm

Sample load: 20 µL

Gradient table:

| Time (min) | Mobile phase A (% V/V) | Mobile phase B (% V/V) |
|------------|------------------------|------------------------|
| 0          | 100                    | 0                      |
| 25         | 100                    | 0                      |
| 60         | 29.3                   | 70.7                   |
| 60.1       | 100                    | 0                      |
| 68         | 100                    | 0                      |

## 10. NMR Spectra

### <sup>1</sup>H NMR Spectra of *Int-2*

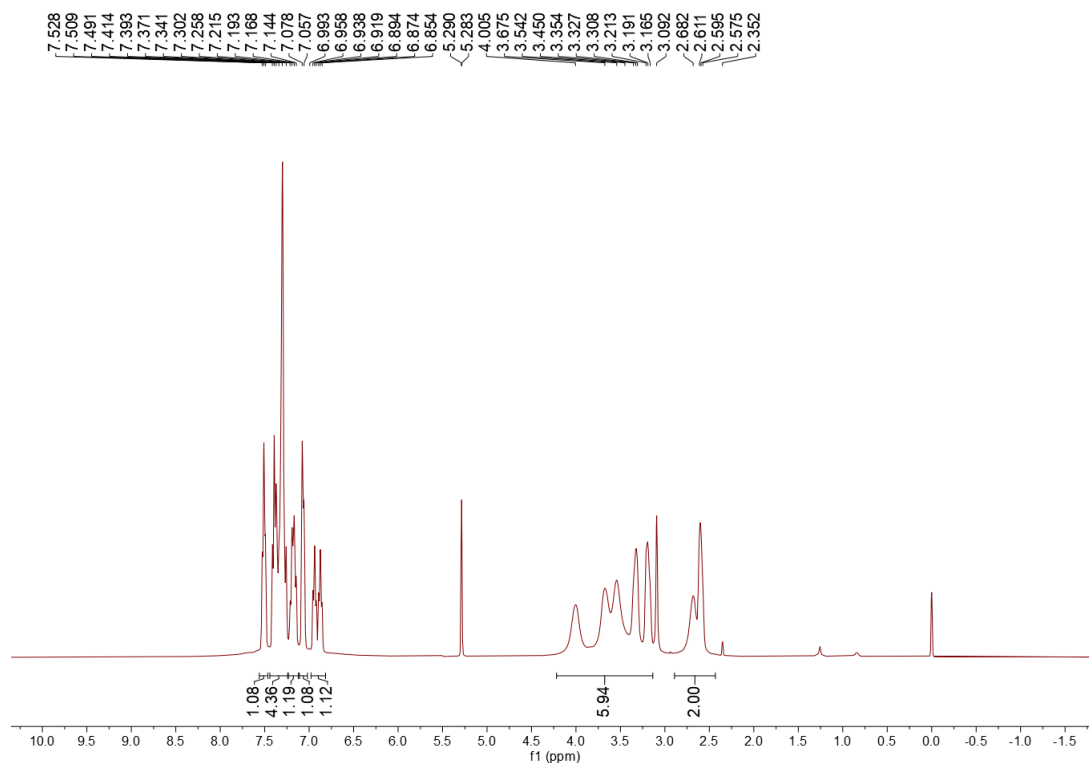

### <sup>13</sup>C NMR Spectra of *Int-2*

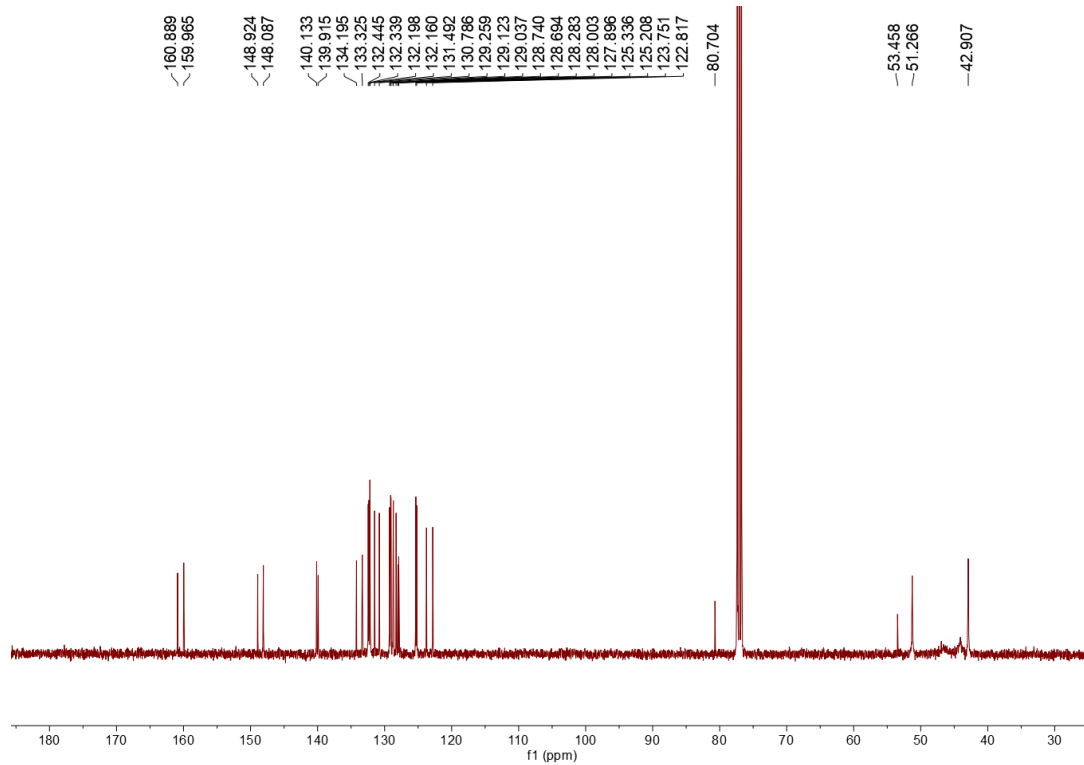

# <sup>1</sup>H NMR Spectra of quetiapine

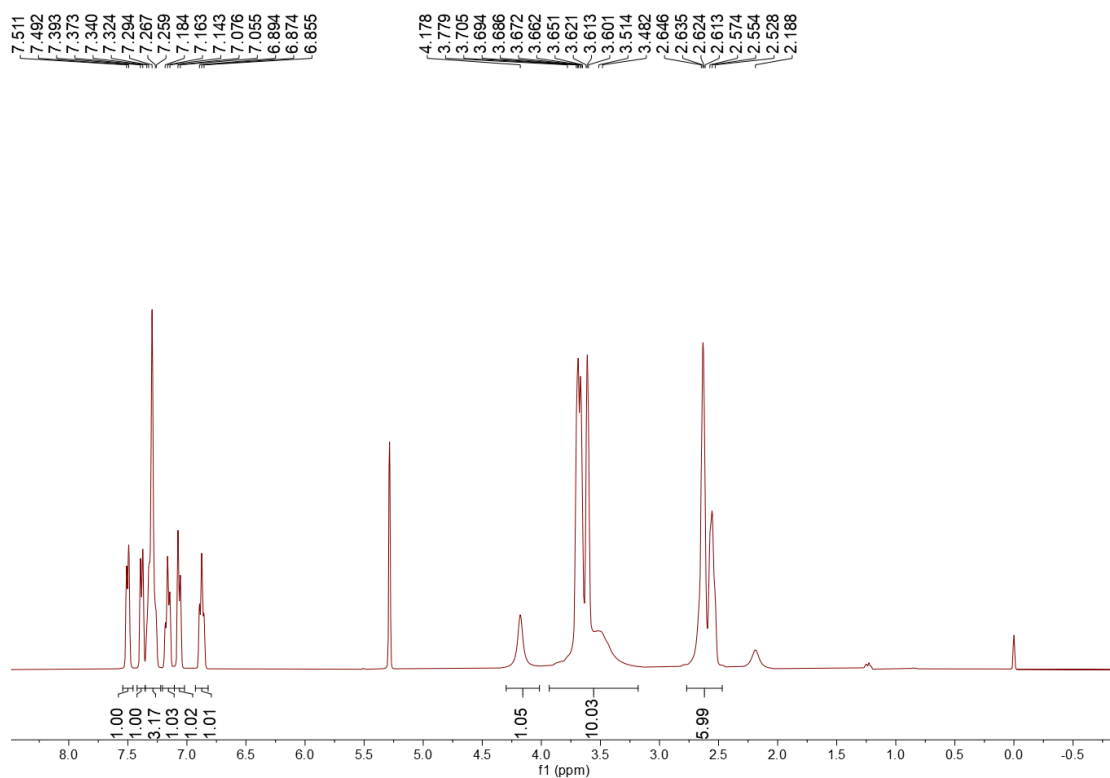

# <sup>13</sup>C NMR Spectra of quetiapine

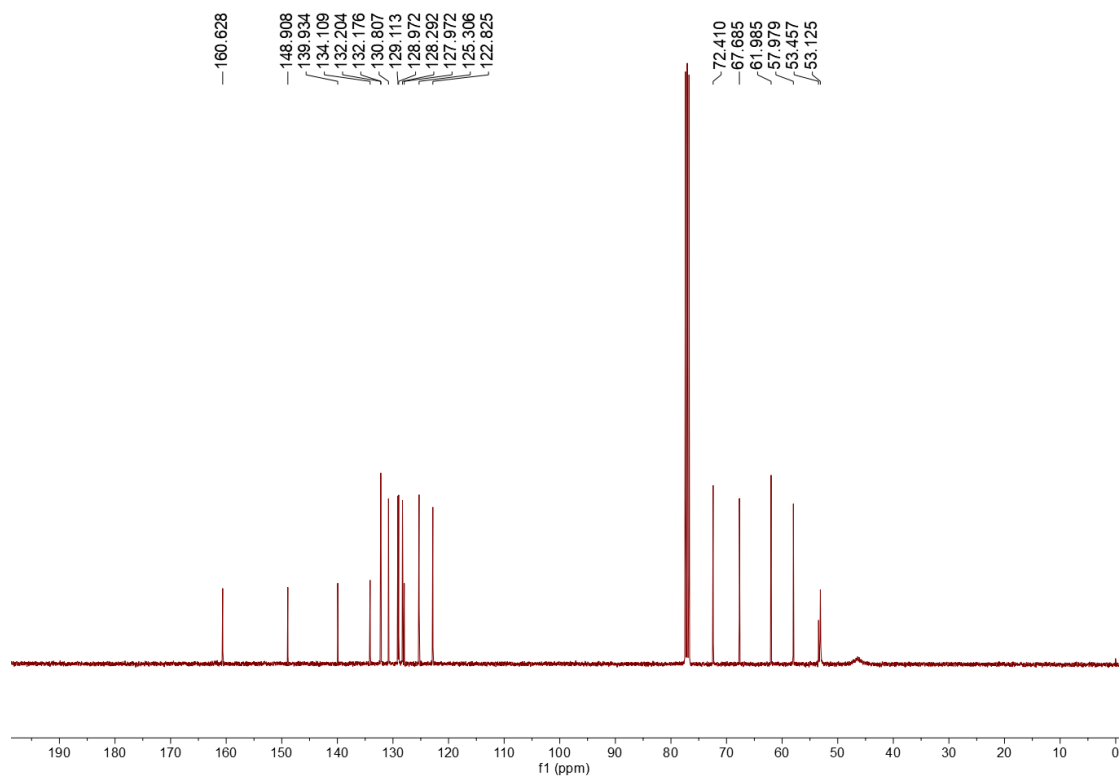

# <sup>1</sup>H NMR Spectra of API

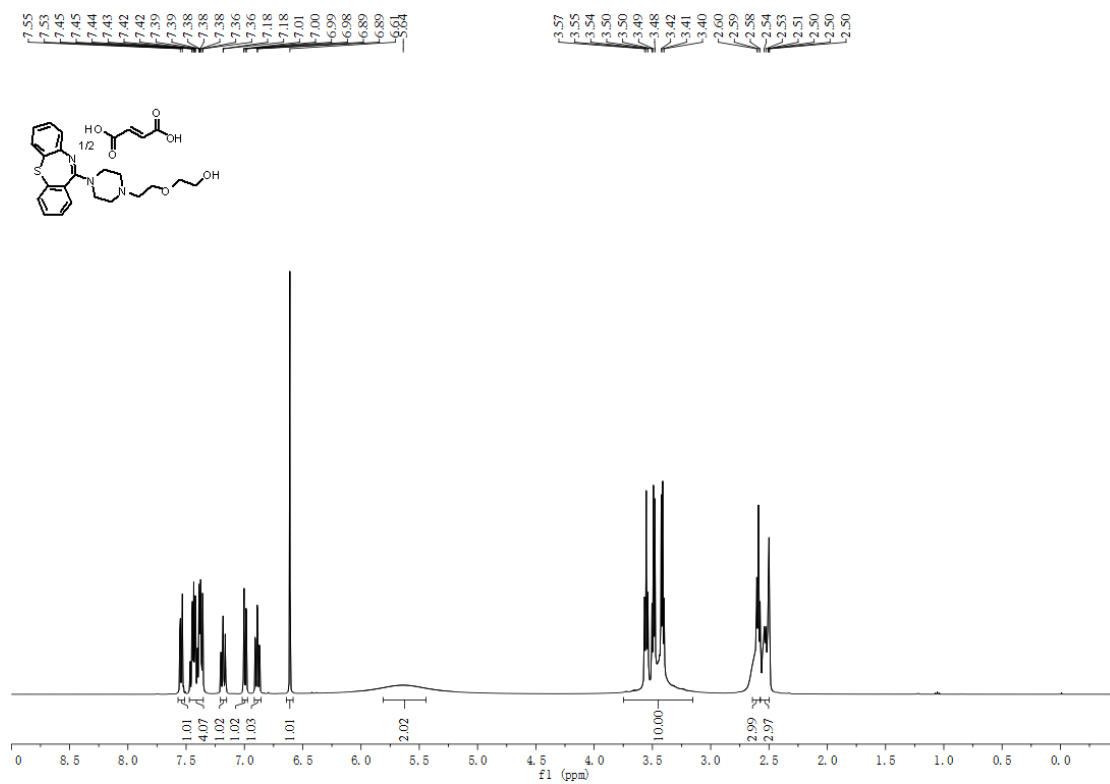

# <sup>13</sup>C NMR Spectra of API

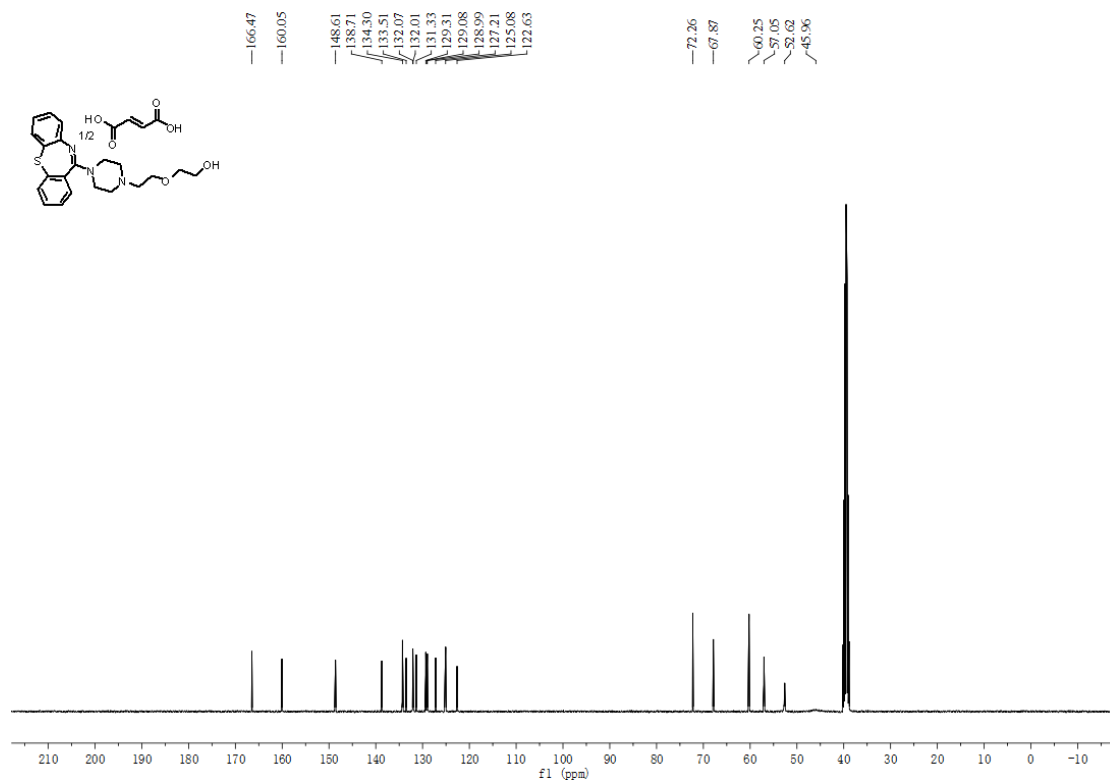

# <sup>1</sup>H NMR Spectra of dimer impurity

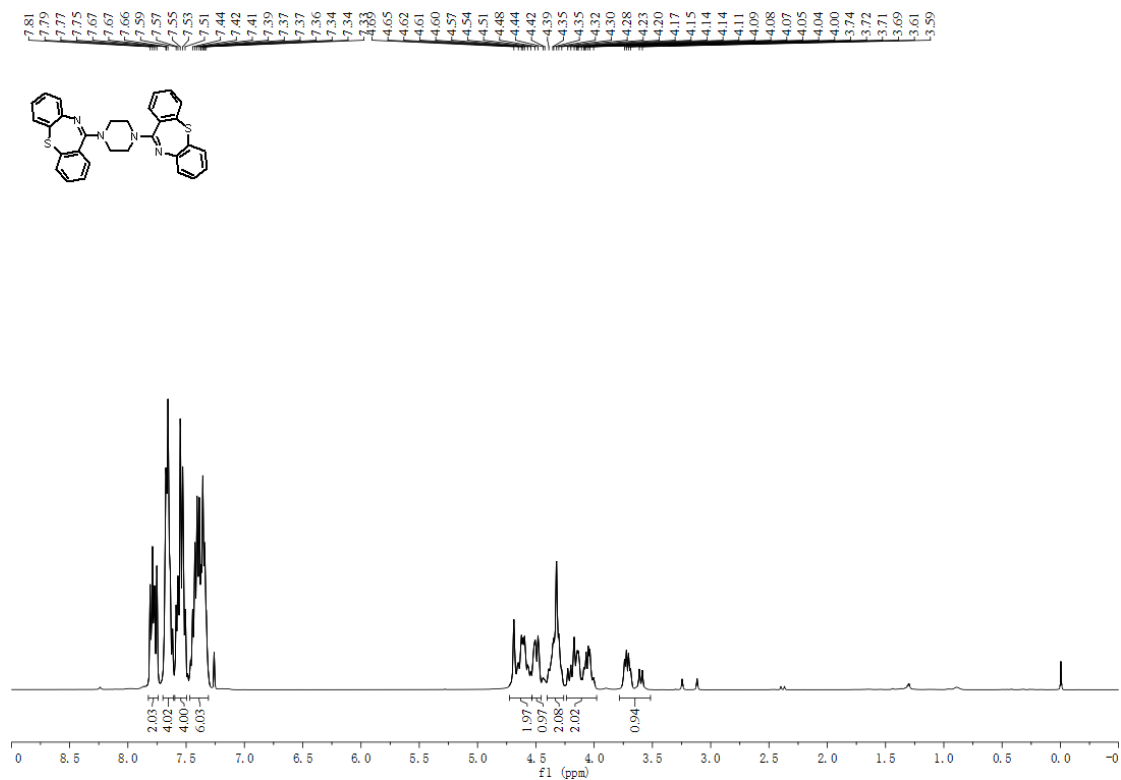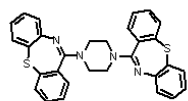

# <sup>1</sup>H NMR Spectra of *Imp-1*

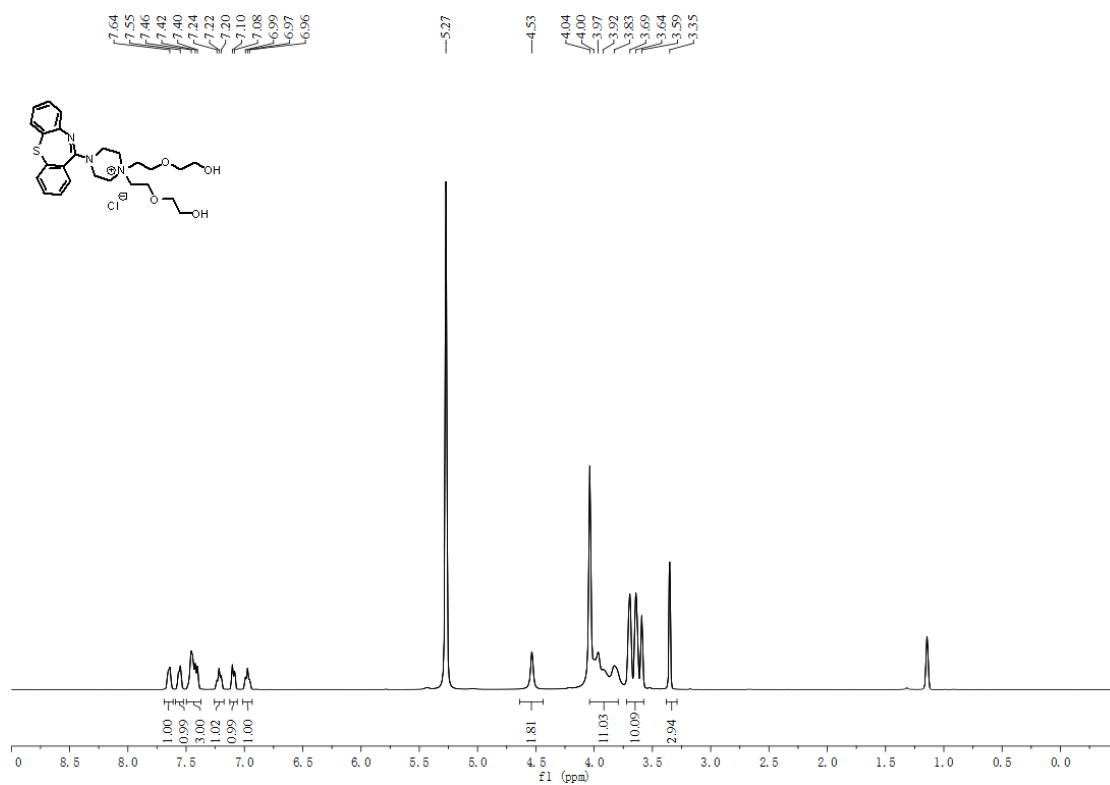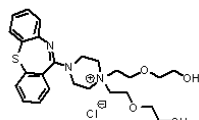

### <sup>13</sup>C NMR Spectra of *Imp-1*

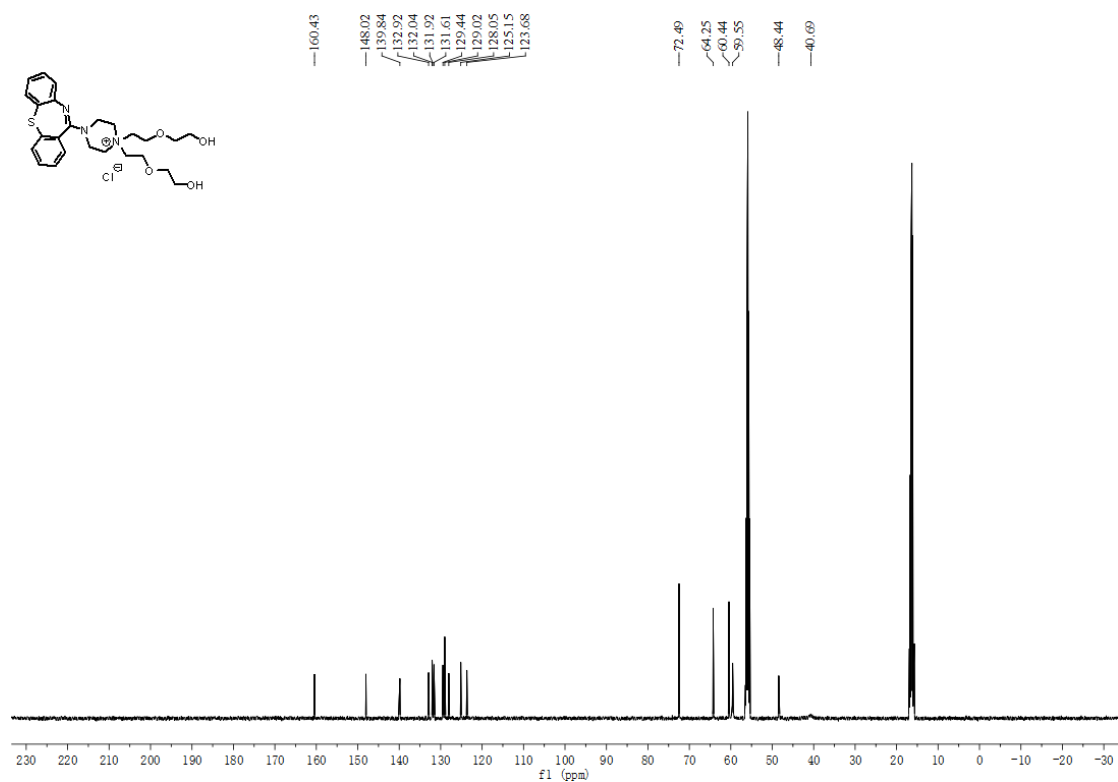

### <sup>1</sup>H NMR Spectra of *Imp-2*

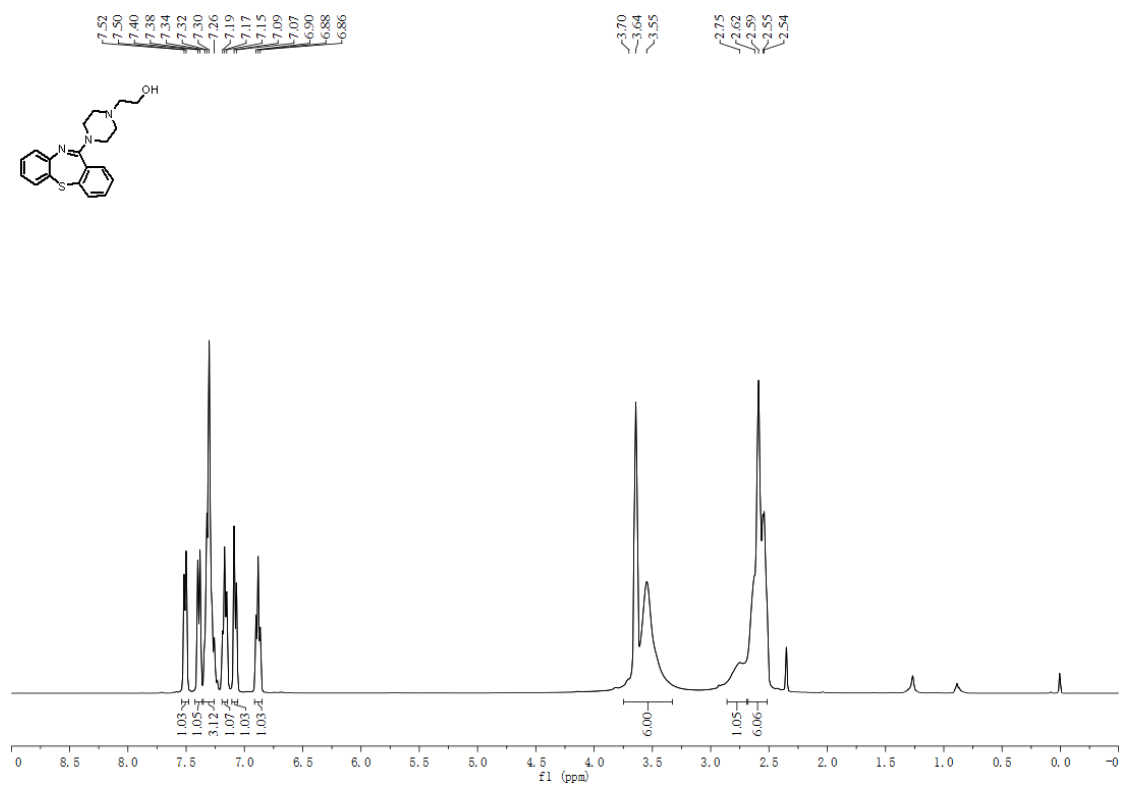

### <sup>13</sup>C NMR Spectra of *Imp-2*

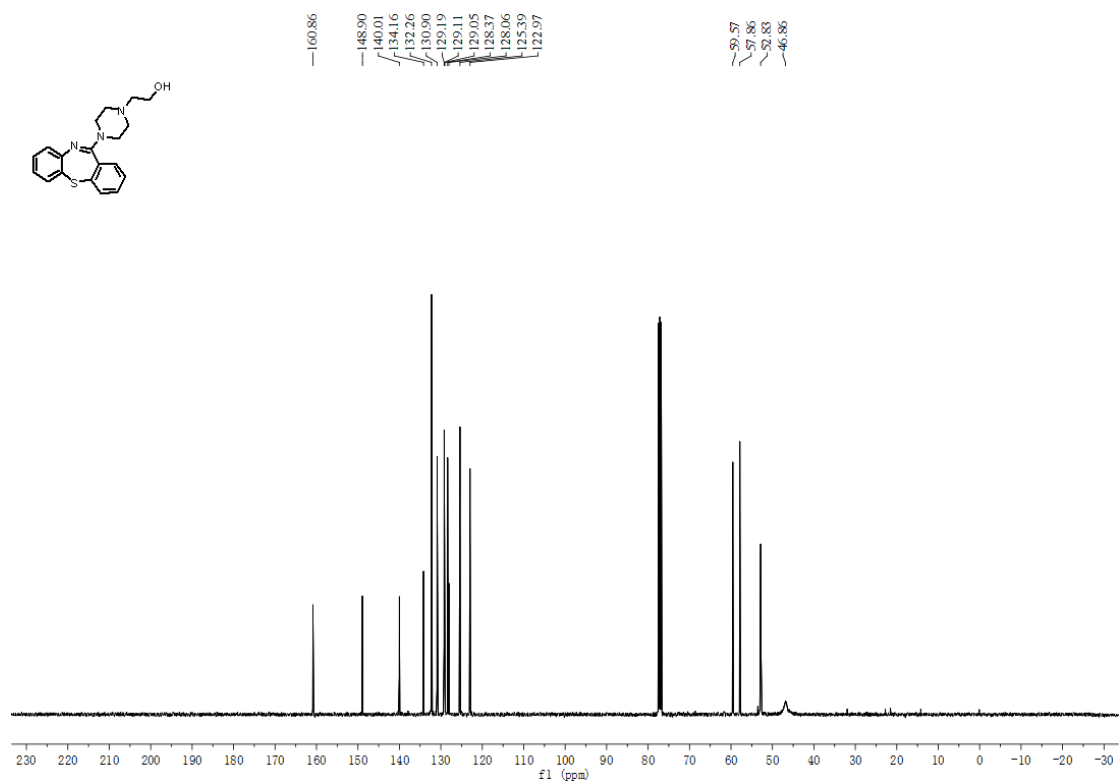

### <sup>1</sup>H NMR Spectra of *Imp-3*

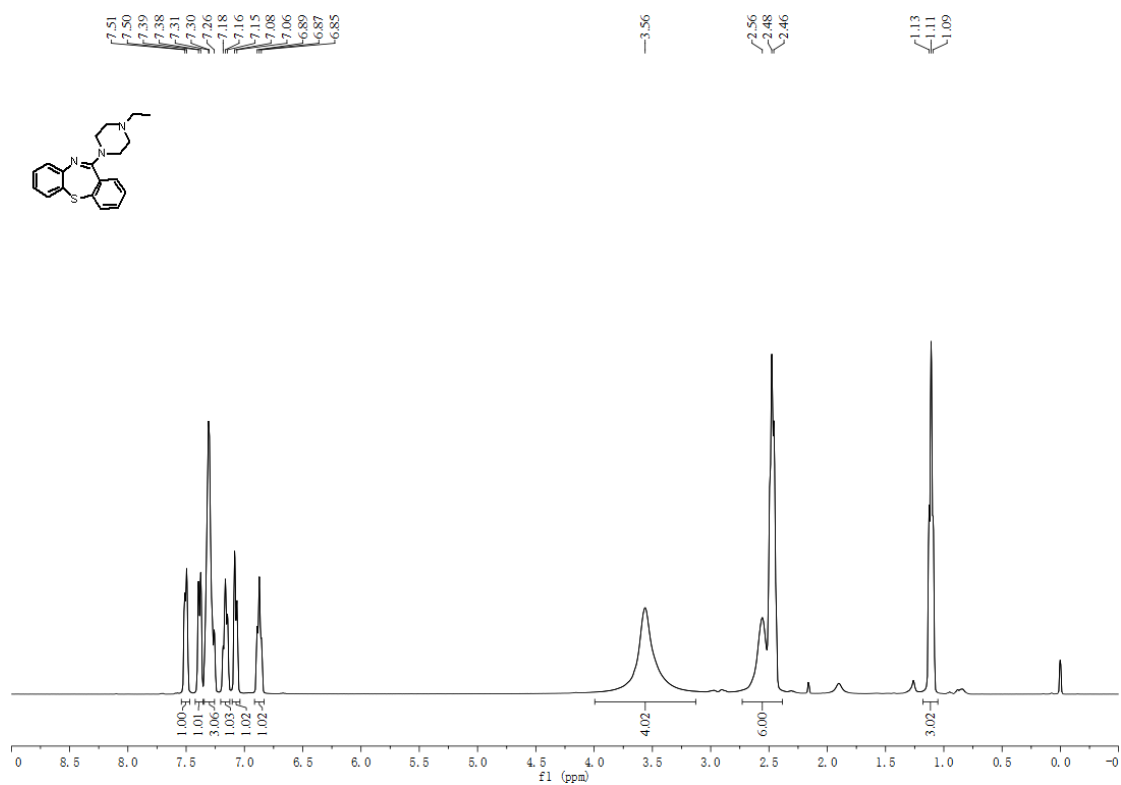

### <sup>13</sup>C NMR Spectra of *Imp-3*

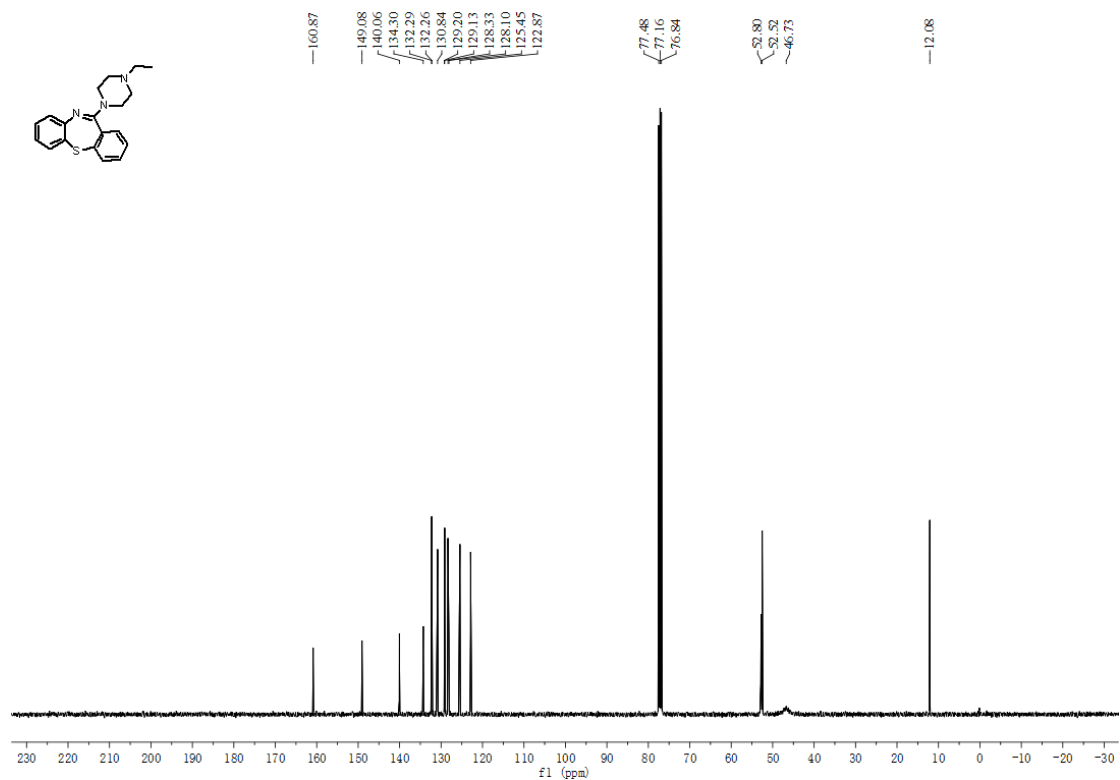

### <sup>1</sup>H NMR Spectra of *Imp-4*

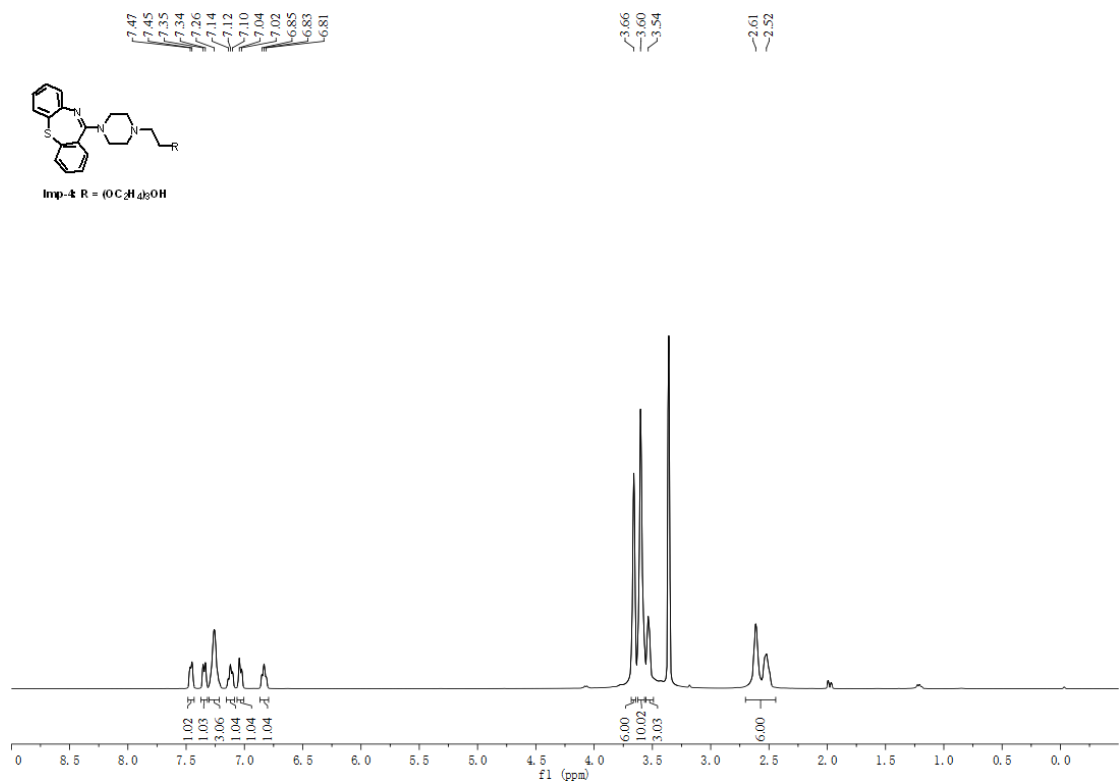

# <sup>13</sup>C NMR Spectra of *Imp-4*

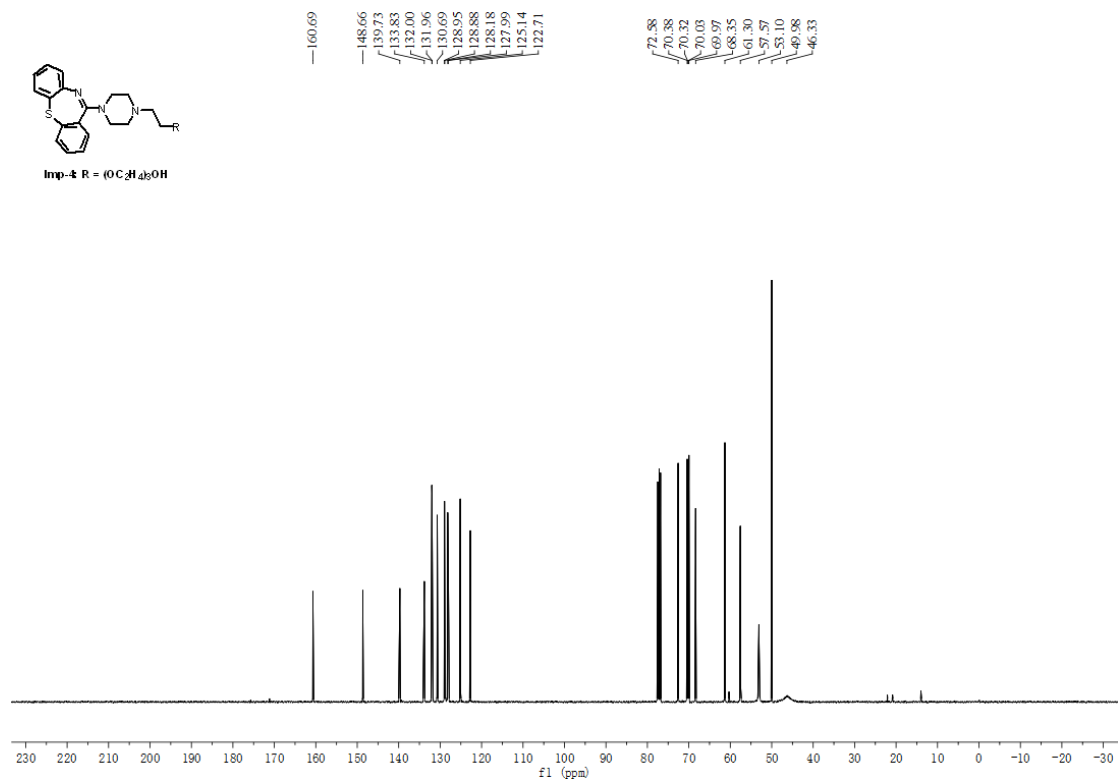

## 11. Representative HPLC chromatograms

### 11.1 HPLC chromatograms of Int-2 before and after pH optimization

HPLC chromatograms of *Int-2* before pH optimization

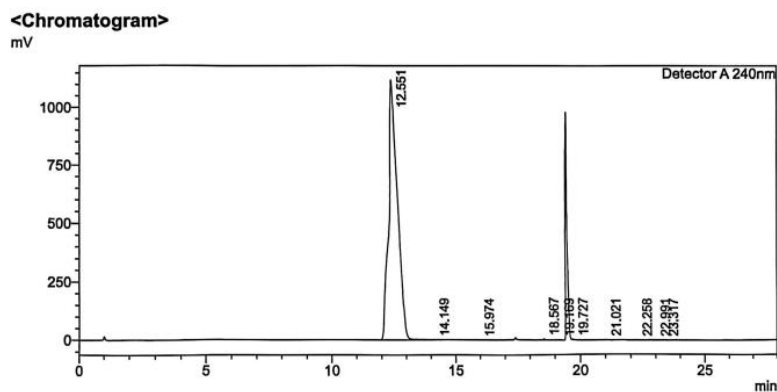

<Peak Table>

| Peak# | Ret. Time | Area     | Height  | Conc. | Unit | Mark | Name       |
|-------|-----------|----------|---------|-------|------|------|------------|
| 1     | 12.551    | 28285335 | 1117819 | 0.000 | mg/L |      | Quetiapine |
| 2     | 14.149    | 19690    | 951     | 0.000 |      | V    |            |
| 3     | 15.974    | 5789     | 394     | 0.000 |      |      |            |
| 4     | 18.567    | 22105    | 5343    | 0.000 | mg/L |      | QTP-06     |
| 5     | 19.169    | 6149     | 946     | 0.000 |      |      |            |
| 6     | 19.727    | 7472     | 1918    | 0.000 |      |      |            |
| 7     | 21.021    | 12874    | 1899    | 0.000 |      |      |            |
| 8     | 22.258    | 5490     | 929     | 0.000 |      |      |            |
| 9     | 22.991    | 7656     | 934     | 0.000 |      | V    |            |
| 10    | 23.317    | 17491    | 1617    | 0.000 | mg/L | V    | QTP-03     |
| Total |           | 28390051 | 1132748 |       |      |      |            |

HPLC chromatograms of *Int-2* after pH optimization

*Int-2* of batch 1

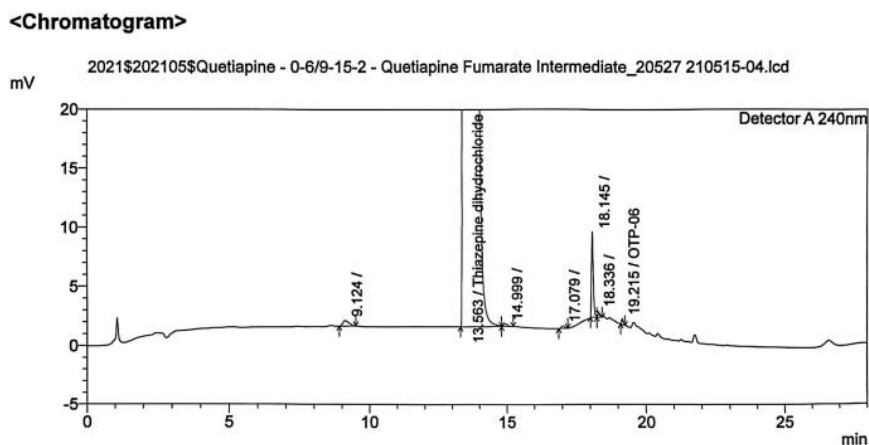

<Results>

| Peak# | Ret. Time | Mark | Area     | Area%    | Name                       |
|-------|-----------|------|----------|----------|----------------------------|
| 1     | 9.124     |      | 7594     | 0.0459   |                            |
| 2     | 13.563    |      | 16494601 | 99.6981  | Thiazepine dihydrochloride |
| 3     | 14.999    | V    | 2382     | 0.0144   |                            |
| 4     | 17.079    |      | 1853     | 0.0112   |                            |
| 5     | 18.145    |      | 33299    | 0.2013   |                            |
| 6     | 18.336    | V    | 2731     | 0.0165   |                            |
| 7     | 19.215    |      | 2091     | 0.0126   | OTP-06                     |
| Total |           |      | 16544551 | 100.0000 |                            |

Int-2 of batch 2

<Chromatogram>

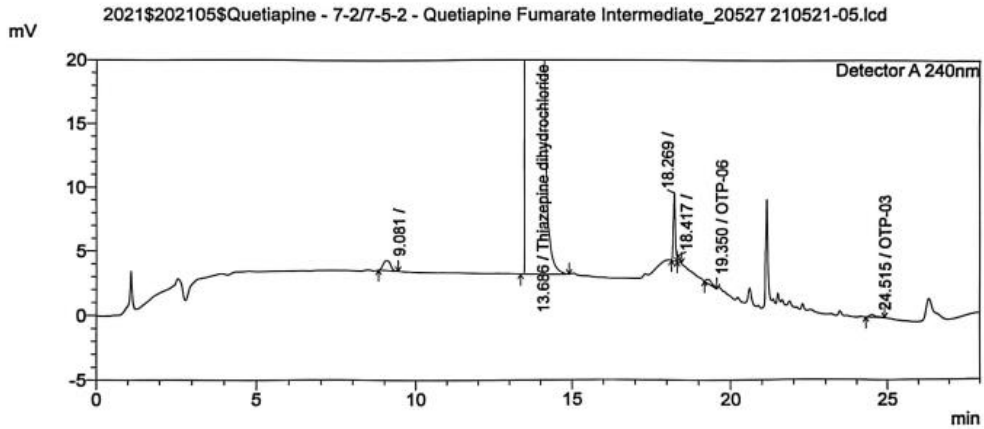

<Results>

Detector A 240nm

| Peak# | Ret. Time | Mark | Area     | Area%    | Name                       |
|-------|-----------|------|----------|----------|----------------------------|
| 1     | 9.081     |      | 13050    | 0.0805   |                            |
| 2     | 13.686    |      | 16165473 | 99.7275  | Thiazepine dihydrochloride |
| 3     | 18.269    |      | 22126    | 0.1365   |                            |
| 4     | 18.417    | V    | 2579     | 0.0159   |                            |
| 5     | 19.350    |      | 3630     | 0.0224   | OTP-06                     |
| 6     | 24.515    |      | 2788     | 0.0172   | OTP-03                     |
| Total |           |      | 16209646 | 100.0000 |                            |

Int-2 of batch 3

<Chromatogram>

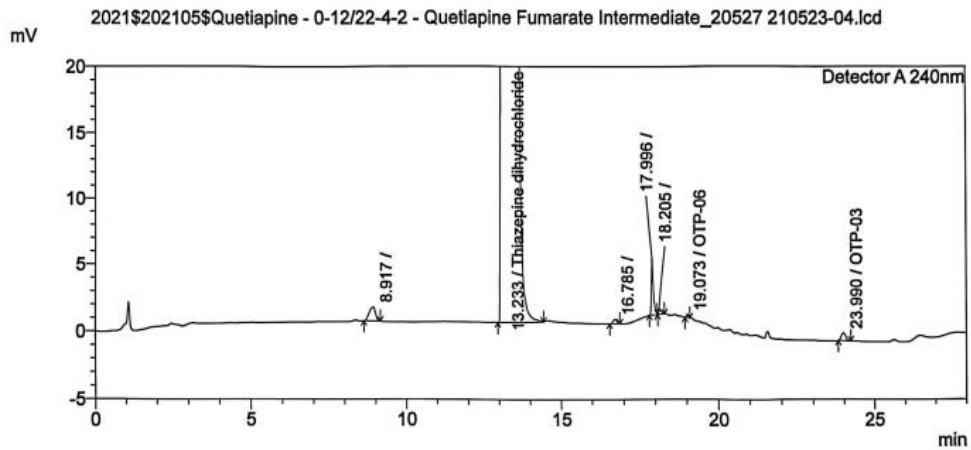

<Results>

Detector A 240nm

| Peak# | Ret. Time | Mark | Area     | Area%    | Name                       |
|-------|-----------|------|----------|----------|----------------------------|
| 1     | 8.917     |      | 14723    | 0.0861   |                            |
| 2     | 13.233    |      | 17050009 | 99.7242  | Thiazepine dihydrochloride |
| 3     | 16.785    |      | 2742     | 0.0160   |                            |
| 4     | 17.996    |      | 20284    | 0.1186   |                            |
| 5     | 18.205    | V    | 2828     | 0.0165   |                            |
| 6     | 19.073    |      | 847      | 0.0050   | OTP-06                     |
| 7     | 23.990    |      | 5725     | 0.0335   | OTP-03                     |
| Total |           |      | 17097158 | 100.0000 |                            |

## 11.2 For Hundred-kilogram scale experiments

### API of Batch 001

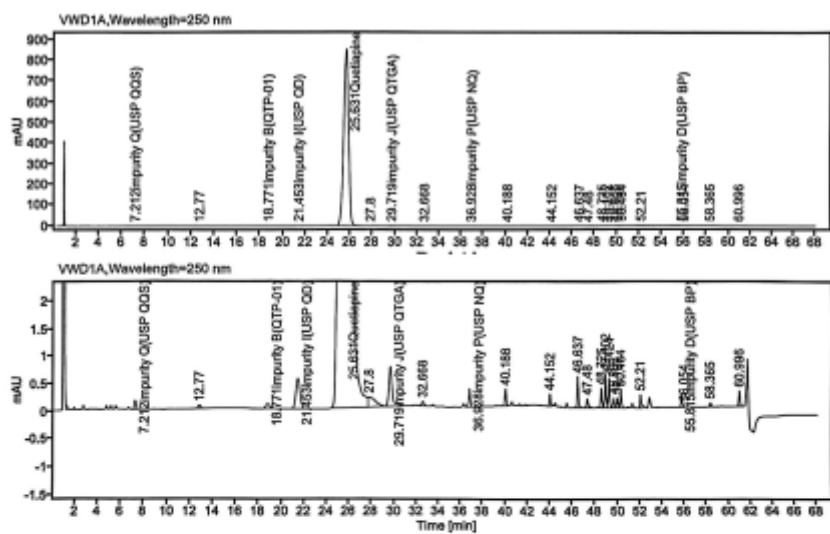

Signal: WVD1A,Wavelength=250 nm

| RT [min] | Type | Height  | Area      | Area%   | Concentration | Name                 |
|----------|------|---------|-----------|---------|---------------|----------------------|
| 7.212    | BB   | 0.159   | 1.721     | 0.0067  | 0.0107        | impurity Q(USP QQS)  |
| 12.770   | BB   | 0.059   | 1.084     | 0.0042  | 0.0042        |                      |
| 14.350   |      |         |           |         |               | impurity G(USP ImpG) |
| 18.771   | VV   | 0.091   | 2.070     | 0.0080  | 0.0088        | impurity B(QTP-01)   |
| 21.453   | BV   | 0.557   | 14.179    | 0.0549  | 0.0548        | impurity I(USP QD)   |
| 25.631   | BV   | 848.918 | 25740.466 | 99.6700 | 99.5709       | Quetiapine           |
| 25.960   |      |         |           |         |               | impurity N           |
| 27.800   | VV   | 0.188   | 8.755     | 0.0339  | 0.0339        |                      |
| 29.719   | VB   | 0.735   | 15.935    | 0.0617  | 0.0616        | impurity J(USP QTGA) |

|        |    |       |       |        |        |                    |
|--------|----|-------|-------|--------|--------|--------------------|
| 32.668 | VB | 0.083 | 1.192 | 0.0046 | 0.0046 |                    |
| 36.928 | VB | 0.331 | 3.354 | 0.0130 | 0.0118 | impurity P(USP NQ) |
| 40.188 | BV | 0.303 | 2.786 | 0.0108 | 0.0108 |                    |
| 44.152 | BV | 0.221 | 1.795 | 0.0069 | 0.0069 |                    |
| 46.637 | VB | 0.574 | 4.718 | 0.0183 | 0.0183 |                    |
| 47.480 | BB | 0.164 | 1.891 | 0.0073 | 0.0073 |                    |
| 48.725 | BV | 0.352 | 2.812 | 0.0109 | 0.0109 |                    |
| 49.102 | VV | 0.617 | 4.955 | 0.0192 | 0.0192 |                    |
| 49.424 | VB | 0.550 | 4.677 | 0.0181 | 0.0181 |                    |
| 49.866 | BB | 0.181 | 1.773 | 0.0069 | 0.0069 |                    |
| 50.168 | BV | 0.182 | 1.500 | 0.0058 | 0.0058 |                    |
| 50.464 | VB | 0.330 | 2.767 | 0.0107 | 0.0107 |                    |
| 52.210 | BV | 0.245 | 2.004 | 0.0078 | 0.0078 |                    |
| 55.815 | BV | 0.242 | 1.910 | 0.0074 | 0.0074 | impurity D(USP BP) |
| 56.054 | VB | 0.031 | 0.326 | 0.0013 | 0.0013 |                    |
| 58.365 | BB | 0.074 | 0.716 | 0.0028 | 0.0028 |                    |
| 60.996 | BB | 0.284 | 2.299 | 0.0089 | 0.0089 |                    |

# API of Batch 002

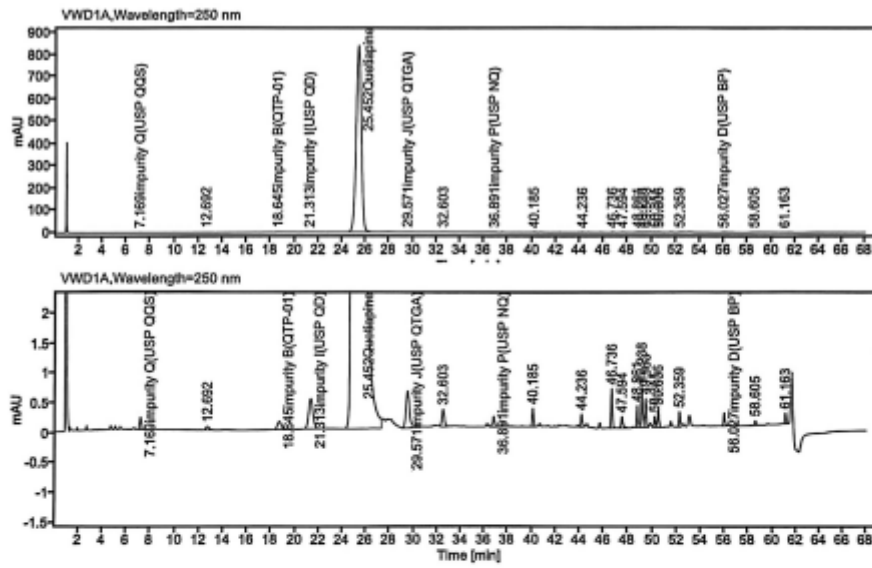

Signal: VWD1A, Wavelength=250 nm

| RT [min] | Type | Height  | Area      | Area%   | Concentration | Name                 |
|----------|------|---------|-----------|---------|---------------|----------------------|
| 7.169    | BB   | 0.199   | 2.133     | 0.0084  | 0.0134        | Impurity Q(USP QQS)  |
| 12.692   | BB   | 0.058   | 1.060     | 0.0042  | 0.0041        |                      |
| 14.350   |      |         |           |         |               | Impurity G(USP ImpG) |
| 18.645   | VV   | 0.137   | 3.119     | 0.0123  | 0.0101        | Impurity B(QTP-01)   |
| 21.313   | VV   | 0.511   | 12.928    | 0.0509  | 0.0504        | Impurity I(USP QD)   |
| 25.452   | BH   | 840.464 | 25324.437 | 99.7089 | 98.6708       | Quetiapine           |
| 25.960   |      |         |           |         |               | Impurity N           |
| 29.571   | BV   | 0.628   | 13.722    | 0.0540  | 0.0535        | Impurity J(USP QTGA) |
| 32.603   | VV   | 0.291   | 4.316     | 0.0170  | 0.0168        |                      |
| 36.891   | VB   | 0.174   | 2.015     | 0.0079  | 0.0071        | Impurity P(USP NQ)   |

| RT [min] | Type | Height | Area  | Area%  | Concentration | Name               |
|----------|------|--------|-------|--------|---------------|--------------------|
| 40.185   | BV   | 0.309  | 2.726 | 0.0107 | 0.0106        |                    |
| 44.236   | BV   | 0.218  | 1.723 | 0.0068 | 0.0067        |                    |
| 46.736   | VV   | 0.674  | 5.369 | 0.0211 | 0.0209        |                    |
| 47.594   | BB   | 0.189  | 2.157 | 0.0085 | 0.0084        |                    |
| 48.861   | BV   | 0.365  | 2.924 | 0.0115 | 0.0114        |                    |
| 49.236   | VV   | 0.683  | 5.482 | 0.0216 | 0.0214        |                    |
| 49.563   | VB   | 0.493  | 4.281 | 0.0169 | 0.0167        |                    |
| 50.311   | BV   | 0.179  | 1.474 | 0.0058 | 0.0057        |                    |
| 50.606   | VB   | 0.303  | 2.518 | 0.0099 | 0.0098        |                    |
| 52.359   | BV   | 0.254  | 2.064 | 0.0081 | 0.0080        |                    |
| 56.027   | BV   | 0.219  | 1.715 | 0.0068 | 0.0067        | Impurity D(USP BP) |
| 58.605   | VV   | 0.061  | 0.772 | 0.0030 | 0.0030        |                    |
| 61.163   | VB   | 0.178  | 1.443 | 0.0057 | 0.0056        |                    |

# API of Batch 003

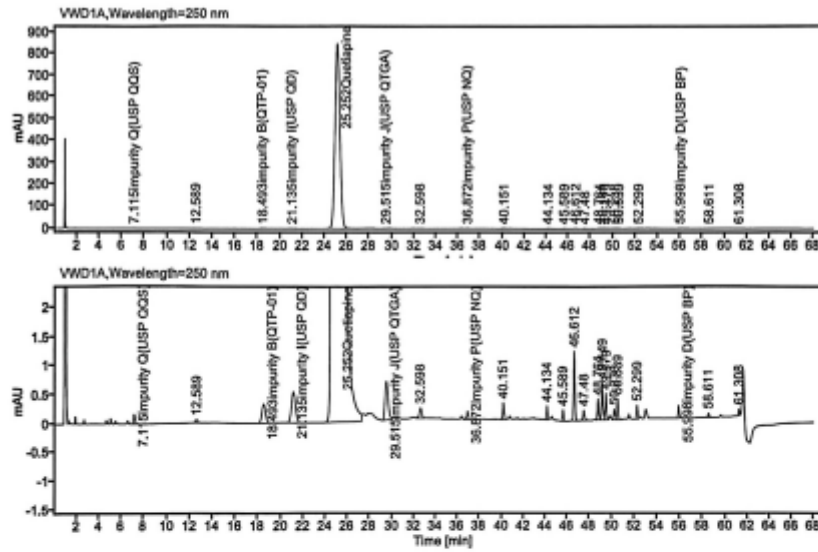

Signal: VWD1A, Wavelength=250 nm

| RT [min] | Type | Height  | Area      | Area%   | Concentration | Name                 |
|----------|------|---------|-----------|---------|---------------|----------------------|
| 7.115    | BB   | 0.161   | 1.729     | 0.0068  | 0.0108        | Impurity Q(USP QQS)  |
| 12.589   | BB   | 0.055   | 0.837     | 0.0037  | 0.0036        |                      |
| 14.350   |      |         |           |         |               | Impurity G(USP ImpG) |
| 18.493   | BV   | 0.324   | 7.291     | 0.0288  | 0.0234        | Impurity B(QTP-01)   |
| 21.135   | BB   | 0.535   | 13.288    | 0.0524  | 0.0514        | Impurity I(USP QD)   |
| 25.252   | BH   | 844.290 | 25263.671 | 99.6804 | 97.6493       | Quetlapline          |
| 25.960   |      |         |           |         |               | Impurity N           |
| 29.515   | BV   | 0.668   | 13.722    | 0.0541  | 0.0530        | Impurity J(USP QTGA) |
| 32.598   | VV   | 0.176   | 2.837     | 0.0112  | 0.0110        |                      |
| 36.872   | VB   | 0.141   | 1.677     | 0.0066  | 0.0059        | Impurity P(USP NQ)   |

| RT [min] | Type | Height | Area  | Area%  | Concentration | Name               |
|----------|------|--------|-------|--------|---------------|--------------------|
| 40.151   | BV   | 0.288  | 2.734 | 0.0108 | 0.0106        |                    |
| 44.134   | BV   | 0.235  | 1.833 | 0.0072 | 0.0071        |                    |
| 45.589   | VB   | 0.189  | 1.493 | 0.0059 | 0.0066        |                    |
| 46.612   | VB   | 1.205  | 9.647 | 0.0381 | 0.0373        |                    |
| 47.480   | BV   | 0.175  | 2.018 | 0.0080 | 0.0078        |                    |
| 48.764   | BV   | 0.356  | 2.839 | 0.0112 | 0.0110        |                    |
| 49.149   | VV   | 0.643  | 5.195 | 0.0205 | 0.0201        |                    |
| 49.479   | VB   | 0.450  | 3.969 | 0.0157 | 0.0154        |                    |
| 50.238   | BV   | 0.180  | 1.511 | 0.0060 | 0.0066        |                    |
| 50.539   | VB   | 0.364  | 3.086 | 0.0122 | 0.0119        |                    |
| 52.299   | BV   | 0.235  | 1.927 | 0.0076 | 0.0074        |                    |
| 55.998   | BV   | 0.218  | 1.738 | 0.0069 | 0.0067        | Impurity D(USP BP) |
| 58.611   | BV   | 0.074  | 0.731 | 0.0029 | 0.0028        |                    |
| 61.308   | BBA  | 0.104  | 0.776 | 0.0031 | 0.0030        |                    |

# API of Batch 004

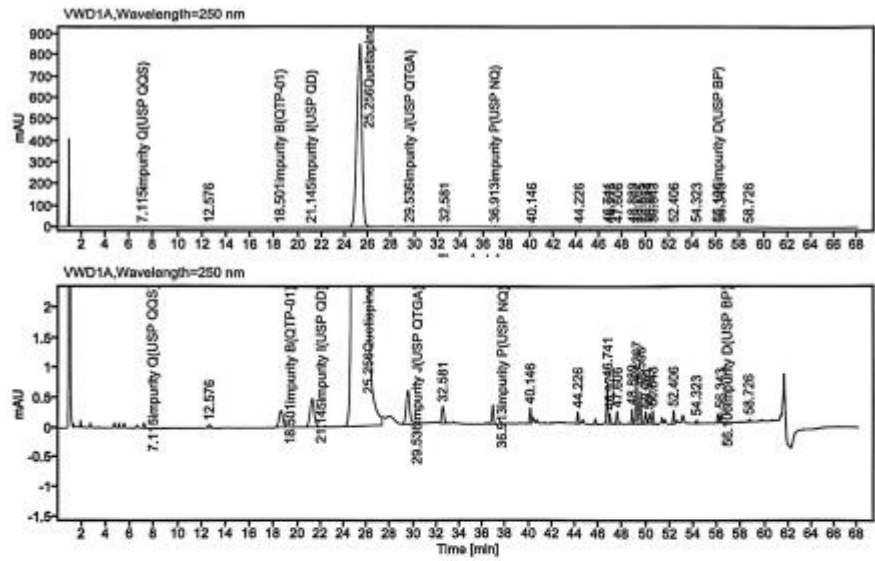

Signal: VWD1A, Wavelength=250 nm

| RT [min] | Type | Height  | Area      | Area%   | Concentration | Name                 |
|----------|------|---------|-----------|---------|---------------|----------------------|
| 7.115    | BB   | 0.085   | 0.957     | 0.0038  | 0.0059        | Impurity Q(USP QQS)  |
| 12.576   | BB   | 0.052   | 0.824     | 0.0032  | 0.0032        |                      |
| 14.350   |      |         |           |         |               | Impurity G(USP ImpG) |
| 18.501   | VV   | 0.285   | 6.336     | 0.0249  | 0.0202        | Impurity B(QTP-01)   |
| 21.145   | VV   | 0.483   | 12.189    | 0.0478  | 0.0469        | Impurity I(USP QD)   |
| 25.256   | VH   | 849.854 | 25421.894 | 98.7036 | 97.8306       | Quetiapine           |
| 25.980   |      |         |           |         |               | Impurity N           |
| 29.536   | BV   | 0.570   | 12.518    | 0.0491  | 0.0482        | Impurity J(USP QTGA) |
| 32.581   | VB   | 0.281   | 4.091     | 0.0160  | 0.0157        |                      |
| 36.913   | VV   | 0.324   | 3.469     | 0.0136  | 0.0121        | impurity P(USP NQ)   |

| RT [min] | Type | Height | Area  | Area%  | Concentration | Name               |
|----------|------|--------|-------|--------|---------------|--------------------|
| 40.146   | BV   | 0.262  | 2.303 | 0.0080 | 0.0089        |                    |
| 44.226   | BV   | 0.202  | 1.635 | 0.0064 | 0.0063        |                    |
| 46.741   | BV   | 0.715  | 5.643 | 0.0217 | 0.0213        |                    |
| 46.976   | VB   | 0.171  | 1.247 | 0.0049 | 0.0048        |                    |
| 47.606   | VV   | 0.210  | 2.027 | 0.0080 | 0.0078        |                    |
| 48.889   | BV   | 0.261  | 2.028 | 0.0080 | 0.0078        |                    |
| 49.267   | VV   | 0.651  | 5.323 | 0.0209 | 0.0205        |                    |
| 49.596   | VB   | 0.555  | 4.656 | 0.0179 | 0.0175        |                    |
| 50.051   | BB   | 0.198  | 1.741 | 0.0068 | 0.0067        |                    |
| 50.349   | BV   | 0.169  | 1.359 | 0.0053 | 0.0052        |                    |
| 50.643   | VB   | 0.221  | 1.969 | 0.0078 | 0.0077        |                    |
| 52.406   | BV   | 0.219  | 1.768 | 0.0069 | 0.0068        |                    |
| 54.323   | VB   | 0.059  | 0.574 | 0.0023 | 0.0022        |                    |
| 56.106   | BV   | 0.150  | 1.210 | 0.0047 | 0.0047        | Impurity D(USP BP) |
| 56.343   | VB   | 0.169  | 1.393 | 0.0055 | 0.0054        |                    |
| 58.726   | BV   | 0.046  | 0.461 | 0.0019 | 0.0019        |                    |

API of Batch 005

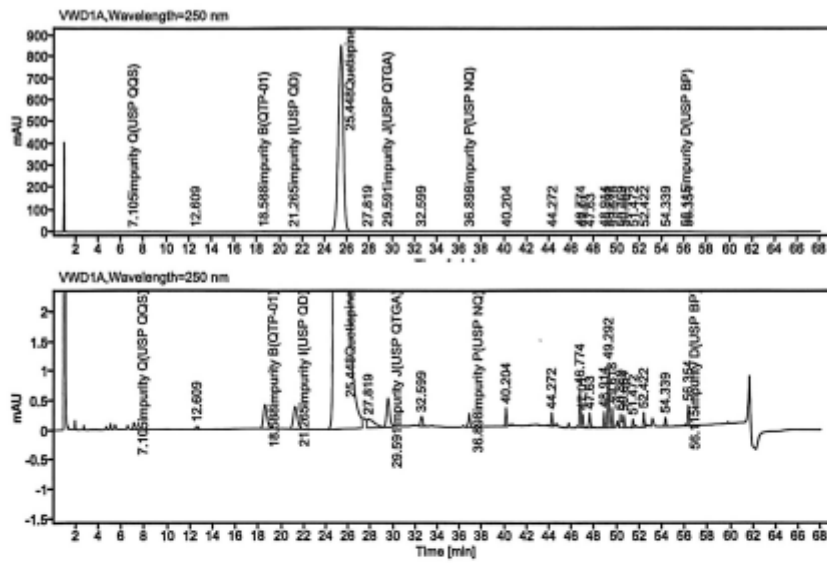

Signal: WVD1A, Wavelength=250 nm

| RT [min] | Type | Height  | Area      | Area%   | Concentration | Name                 |
|----------|------|---------|-----------|---------|---------------|----------------------|
| 7.105    | BB   | 0.109   | 1.219     | 0.0047  | 0.0075        | Impurity Q(USP QQS)  |
| 12.609   | BB   | 0.048   | 0.823     | 0.0032  | 0.0032        |                      |
| 14.350   |      |         |           |         |               | Impurity G(USP ImpG) |
| 18.588   | VV   | 0.401   | 9.057     | 0.0349  | 0.0289        | Impurity B(QTP-01)   |
| 21.285   | VV   | 0.377   | 9.825     | 0.0371  | 0.0370        | Impurity I(USP QD)   |
| 25.448   | BH   | 851.947 | 25875.507 | 99.6865 | 99.4577       | Quetiapine           |
| 25.980   |      |         |           |         |               | Impurity N           |
| 27.819   | VB   | 0.151   | 6.964     | 0.0268  | 0.0268        |                      |
| 29.591   | BV   | 0.487   | 10.282    | 0.0396  | 0.0395        | Impurity J(USP QTGA) |
| 32.599   | VB   | 0.165   | 2.435     | 0.0094  | 0.0094        |                      |

| RT [min] | Type | Height | Area  | Area%  | Concentration | Name               |
|----------|------|--------|-------|--------|---------------|--------------------|
| 36.898   | VB   | 0.233  | 2.613 | 0.0101 | 0.0091        | Impurity P(USP NQ) |
| 40.204   | BV   | 0.312  | 2.783 | 0.0107 | 0.0107        |                    |
| 44.272   | BV   | 0.219  | 1.720 | 0.0066 | 0.0066        |                    |
| 46.774   | BV   | 0.643  | 4.895 | 0.0189 | 0.0188        |                    |
| 47.010   | VB   | 0.221  | 1.651 | 0.0064 | 0.0063        |                    |
| 47.630   | BV   | 0.238  | 2.283 | 0.0088 | 0.0088        |                    |
| 48.914   | BV   | 0.266  | 2.114 | 0.0081 | 0.0081        |                    |
| 49.292   | VV   | 1.086  | 8.630 | 0.0332 | 0.0332        |                    |
| 49.618   | VB   | 0.337  | 2.604 | 0.0100 | 0.0100        |                    |
| 50.399   | BV   | 0.216  | 2.247 | 0.0087 | 0.0086        |                    |
| 50.864   | VB   | 0.204  | 1.914 | 0.0074 | 0.0074        |                    |
| 51.472   | VV   | 0.136  | 1.167 | 0.0046 | 0.0046        |                    |
| 52.422   | BV   | 0.242  | 1.930 | 0.0074 | 0.0074        |                    |
| 54.339   | VB   | 0.149  | 1.303 | 0.0050 | 0.0050        |                    |
| 56.115   | BV   | 0.032  | 0.297 | 0.0011 | 0.0011        | Impurity D(USP BP) |
| 56.354   | VV   | 0.344  | 2.809 | 0.0108 | 0.0108        |                    |

# API of Batch 006

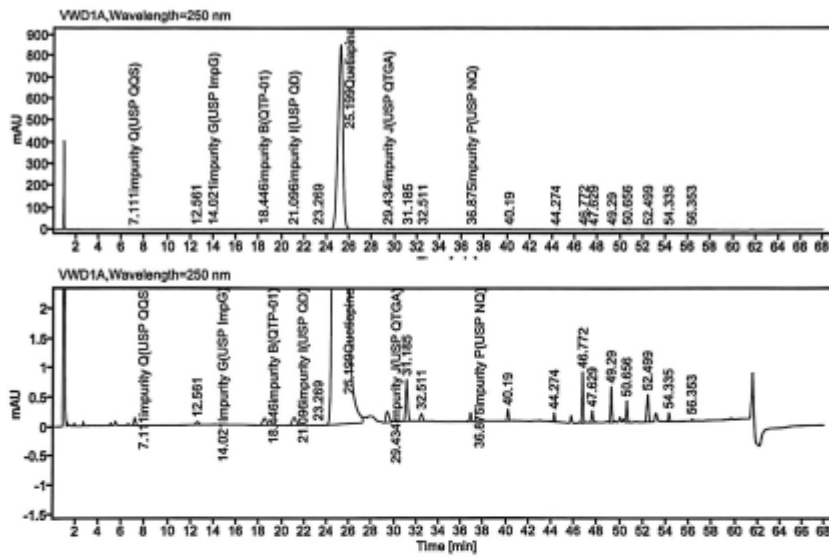

Signal: WVD1A, Wavelength=250 nm

| RT [min] | Type | Height  | Area      | Area%   | Concentration | Name                 |
|----------|------|---------|-----------|---------|---------------|----------------------|
| 7.111    | BB   | 0.127   | 1.418     | 0.0056  | 0.0088        | impurity Q(USP QQS)  |
| 12.561   | BB   | 0.050   | 0.881     | 0.0034  | 0.0033        |                      |
| 14.021   | BV   | 0.007   | 0.091     | 0.0004  | 0.0003        | impurity G(USP ImpG) |
| 18.446   | VV   | 0.117   | 2.808     | 0.0102  | 0.0083        | impurity B(QTP-01)   |
| 21.096   | VV   | 0.136   | 3.480     | 0.0136  | 0.0133        | impurity I(USP QD)   |
| 23.269   | VB   | 0.004   | 0.096     | 0.0004  | 0.0004        |                      |
| 25.199   | BH   | 850.766 | 25465.621 | 99.7958 | 97.6884       | Quetiapine           |
| 25.960   |      |         |           |         |               | impurity N           |
| 29.434   | BV   | 0.187   | 3.749     | 0.0147  | 0.0144        | impurity J(USP QTGA) |
| 31.185   | BB   | 0.710   | 9.446     | 0.0370  | 0.0362        |                      |

| RT [min] | Type | Height | Area  | Area%  | Concentration | Name               |
|----------|------|--------|-------|--------|---------------|--------------------|
| 32.511   | BV   | 0.126  | 1.807 | 0.0071 | 0.0069        |                    |
| 36.875   | VB   | 0.153  | 1.699 | 0.0067 | 0.0059        | impurity P(USP NQ) |
| 40.190   | BV   | 0.195  | 1.681 | 0.0066 | 0.0064        |                    |
| 44.274   | BB   | 0.150  | 1.209 | 0.0047 | 0.0046        |                    |
| 46.772   | VV   | 0.878  | 6.864 | 0.0269 | 0.0263        |                    |
| 47.829   | BV   | 0.200  | 2.241 | 0.0088 | 0.0086        |                    |
| 49.290   | VV   | 0.611  | 4.776 | 0.0187 | 0.0183        |                    |
| 50.656   | VB   | 0.363  | 3.050 | 0.0120 | 0.0117        |                    |
| 52.499   | BB   | 0.467  | 5.329 | 0.0209 | 0.0204        |                    |
| 54.335   | BV   | 0.146  | 1.266 | 0.0050 | 0.0049        |                    |
| 55.700   |      |        |       |        |               | impurity D(USP BP) |
| 56.353   | VV   | 0.036  | 0.429 | 0.0017 | 0.0016        |                    |
